# Supplementary material for: Agelasine Diterpenoids and Cbl-b Inhibitory Ageliferins from the Coralline Demosponge Astrosclera willeyana
Source: MDPI journal article supplement (doi:10.3390/md19070361), 2021-06-24
Supplement: s1 [file s1]

## *Supporting Information*

# Agelasine Diterpenoids and Cbl-b Inhibitory Agelifेरins from the Coralline Demosponge *Astrosclera willeyana*

Wei Jiang,<sup>†,‡</sup> Dongdong Wang,<sup>‡</sup> Brice A. P. Wilson,<sup>‡</sup> Unwoo Kang,<sup>‡</sup> Heidi R. Bokesch,<sup>‡,§</sup> Emily A. Smith,<sup>‡,§</sup> Antony Wamiru,<sup>‡,§</sup> Katya Goncharova,<sup>‡,°</sup> Donna Voeller,<sup>⊥</sup> Stanley Lipkowitz,<sup>⊥</sup> Barry R. O'Keefe,<sup>‡,|</sup> Kirk R. Gustafson\*,<sup>‡</sup>

<sup>†</sup>Marine Science & Technology Institute, College of Environmental Science & Engineering, Yangzhou University, Yangzhou, Jiangsu 225127, People's Republic of China

<sup>‡</sup>Molecular Targets Program, Center for Cancer Research, National Cancer Institute, Frederick, Maryland 21702-1201, United States

<sup>§</sup>Basic Science Program, Leidos Biomedical Research, Inc., Frederick National Laboratory for Cancer Research, Frederick, Maryland 21702-1201, United States

<sup>⊥</sup>Women's Malignancies Branch, Center for Cancer Research, National Cancer Institute, Bethesda, Maryland 20892, United States

<sup>°</sup>Advanced Biomedical Computational Science, Frederick National Laboratory for Cancer Research, Frederick, Maryland 21702-1201, United States

<sup>|</sup>Natural Products Branch, Developmental Therapeutics Program, Division of Cancer Treatment and Diagnosis, National Cancer Institute, Frederick, Maryland 21701-1201, United States

## Supporting Information

**Figure S1.**  $^1\text{H}$  NMR spectrum (600 MHz) of Agelasine W (**1**) in  $\text{CD}_3\text{OD}$ .

**Figure S2.**  $^{13}\text{C}$  NMR spectrum (150 MHz) of Agelasine W (**1**) in  $\text{CD}_3\text{OD}$ .

**Figure S3.** HSQC spectrum of Agelasine W (**1**) in  $\text{CD}_3\text{OD}$ .

**Figure S4.** HMBC spectrum of Agelasine W (**1**) in  $\text{CD}_3\text{OD}$ .

**Figure S5.** COSY spectrum of Agelasine W (**1**) in  $\text{CD}_3\text{OD}$ .

**Figure S6.** NOESY spectrum of Agelasine W (**1**) in  $\text{CD}_3\text{OD}$ .

**Figure S7.** HRESIMS of Agelasine W (**1**).

**Figure S8.** IR spectrum of Agelasine W (**1**).

**Figure S9.** UV spectrum of Agelasine W (**1**).

**Figure S10.**  $^1\text{H}$  NMR spectrum (600 MHz) of Agelasine X (**2**) in  $\text{CD}_3\text{OD}$ .

**Figure S11.**  $^{13}\text{C}$  NMR spectrum (150 MHz) of Agelasine X (**2**) in  $\text{CD}_3\text{OD}$ .

**Figure S12.** HSQC spectrum of Agelasine X (**2**) in  $\text{CD}_3\text{OD}$ .

**Figure S13.** HMBC spectrum of Agelasine X (**2**) in  $\text{CD}_3\text{OD}$ .

**Figure S14.** COSY spectrum of Agelasine X (**2**) in  $\text{CD}_3\text{OD}$ .

**Figure S15.** HRESIMS of Agelasine X (**2**).

**Figure S16.** IR spectrum of Agelasine X (**2**).

**Figure S17.** UV spectrum of Agelasine X (**2**).

**Figure S18.**  $^1\text{H}$  NMR spectrum (600 MHz) of Agelasine Y (**3**) in  $\text{CD}_3\text{OD}$ .

**Figure S19.**  $^{13}\text{C}$  NMR spectrum (150 MHz) of Agelasine Y (**3**) in  $\text{CD}_3\text{OD}$ .

**Figure S20.** HSQC spectrum of Agelasine Y (**3**) in  $\text{CD}_3\text{OD}$ .

**Figure S21.** HMBC spectrum of Agelasine Y (**3**) in  $\text{CD}_3\text{OD}$ .

**Figure S22.** COSY spectrum of Agelasine Y (**3**) in  $\text{CD}_3\text{OD}$ .

**Figure S23.** NOESY spectrum of Agelasine Y (**3**) in  $\text{CD}_3\text{OD}$ .

**Figure S24.** HRESIMS of Agelasine Y (**3**).

**Figure S25.** IR spectrum of Agelasine Y (**3**).

**Figure S26.** UV spectrum of Agelasine Y (**3**).

**Figure S27.**  $^1\text{H}$  NMR spectrum (600 MHz) of *N*(1)-methylisoageliferin (**4**) in  $\text{CD}_3\text{OD}$ .

**Figure S28.**  $^{13}\text{C}$  NMR spectrum (150 MHz) of *N*(1)-methylisoageliferin (**4**) in  $\text{CD}_3\text{OD}$ .

**Figure S29.** HSQC spectrum of *N*(1)-methylisoageliferin (**4**) in  $\text{CD}_3\text{OD}$ .

**Figure S30.** HMBC spectrum of *N*(1)-methylisoageliferin (**4**) in  $\text{CD}_3\text{OD}$ .

**Figure S31.** COSY spectrum of *N*(1)-methylisoageliferin (**4**) in  $\text{CD}_3\text{OD}$ .

**Figure S32.** ECD spectrum of *N*(1)-methylisoageliferin (**4**).

**Figure S33.** HRESIMS of *N*(1)-methylisoageliferin (**4**).

**Figure S34.** IR spectrum of *N*(1)-methylisoageliferin (**4**).

**Figure S35.** UV spectrum of *N*(1)-methylisoageliferin (**4**).

**Table S1.**  $^1\text{H}$  NMR (600 MHz) data for compounds **5-10** in  $\text{CD}_3\text{OD}$ .

**Table S2.**  $^{13}\text{C}$  NMR (150 MHz) data for compound **5-10** in  $\text{CD}_3\text{OD}$ .

**Table S3.**  $^{13}\text{C}$  NMR (150 MHz) data for compound **3** and closely related clerodane diastereomers in  $\text{CDCl}_3$ .

179B034\_46.1.fid

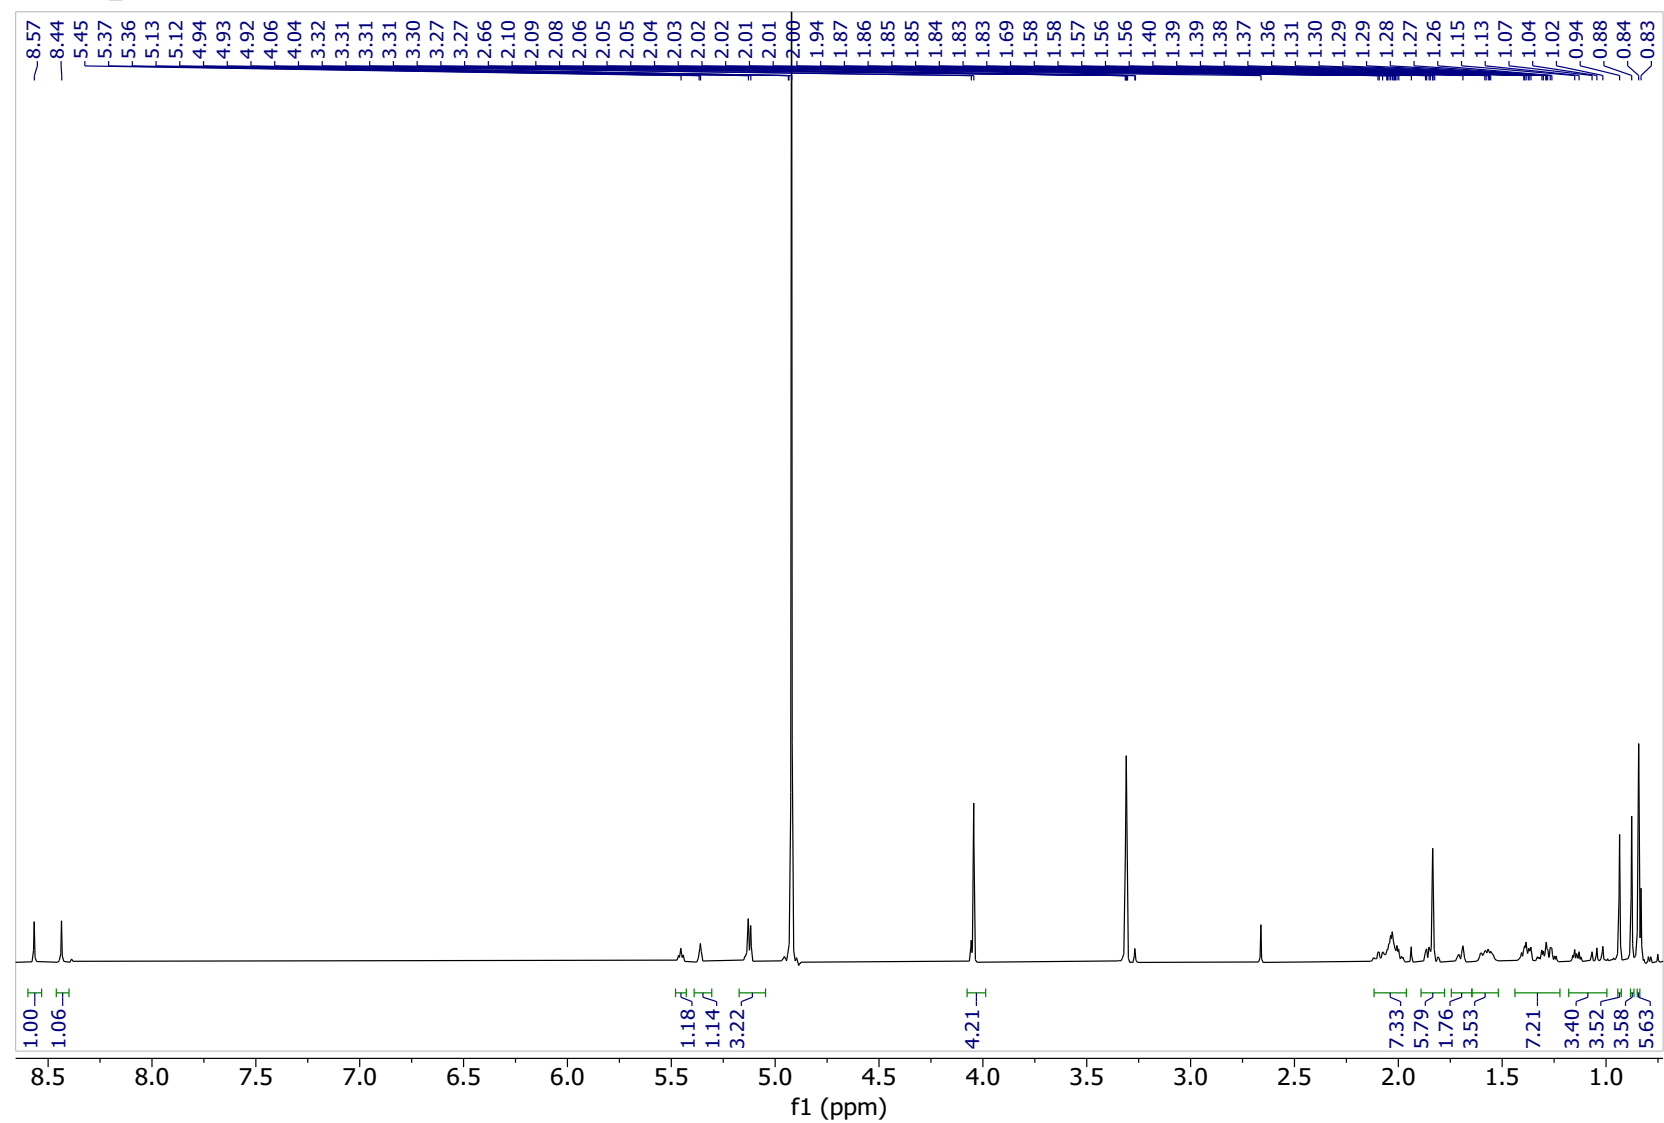

**Figure S1.** <sup>1</sup>H NMR spectrum (600 MHz) of Agelasine W (1) in CD<sub>3</sub>OD.



179B034\_46.8.fid

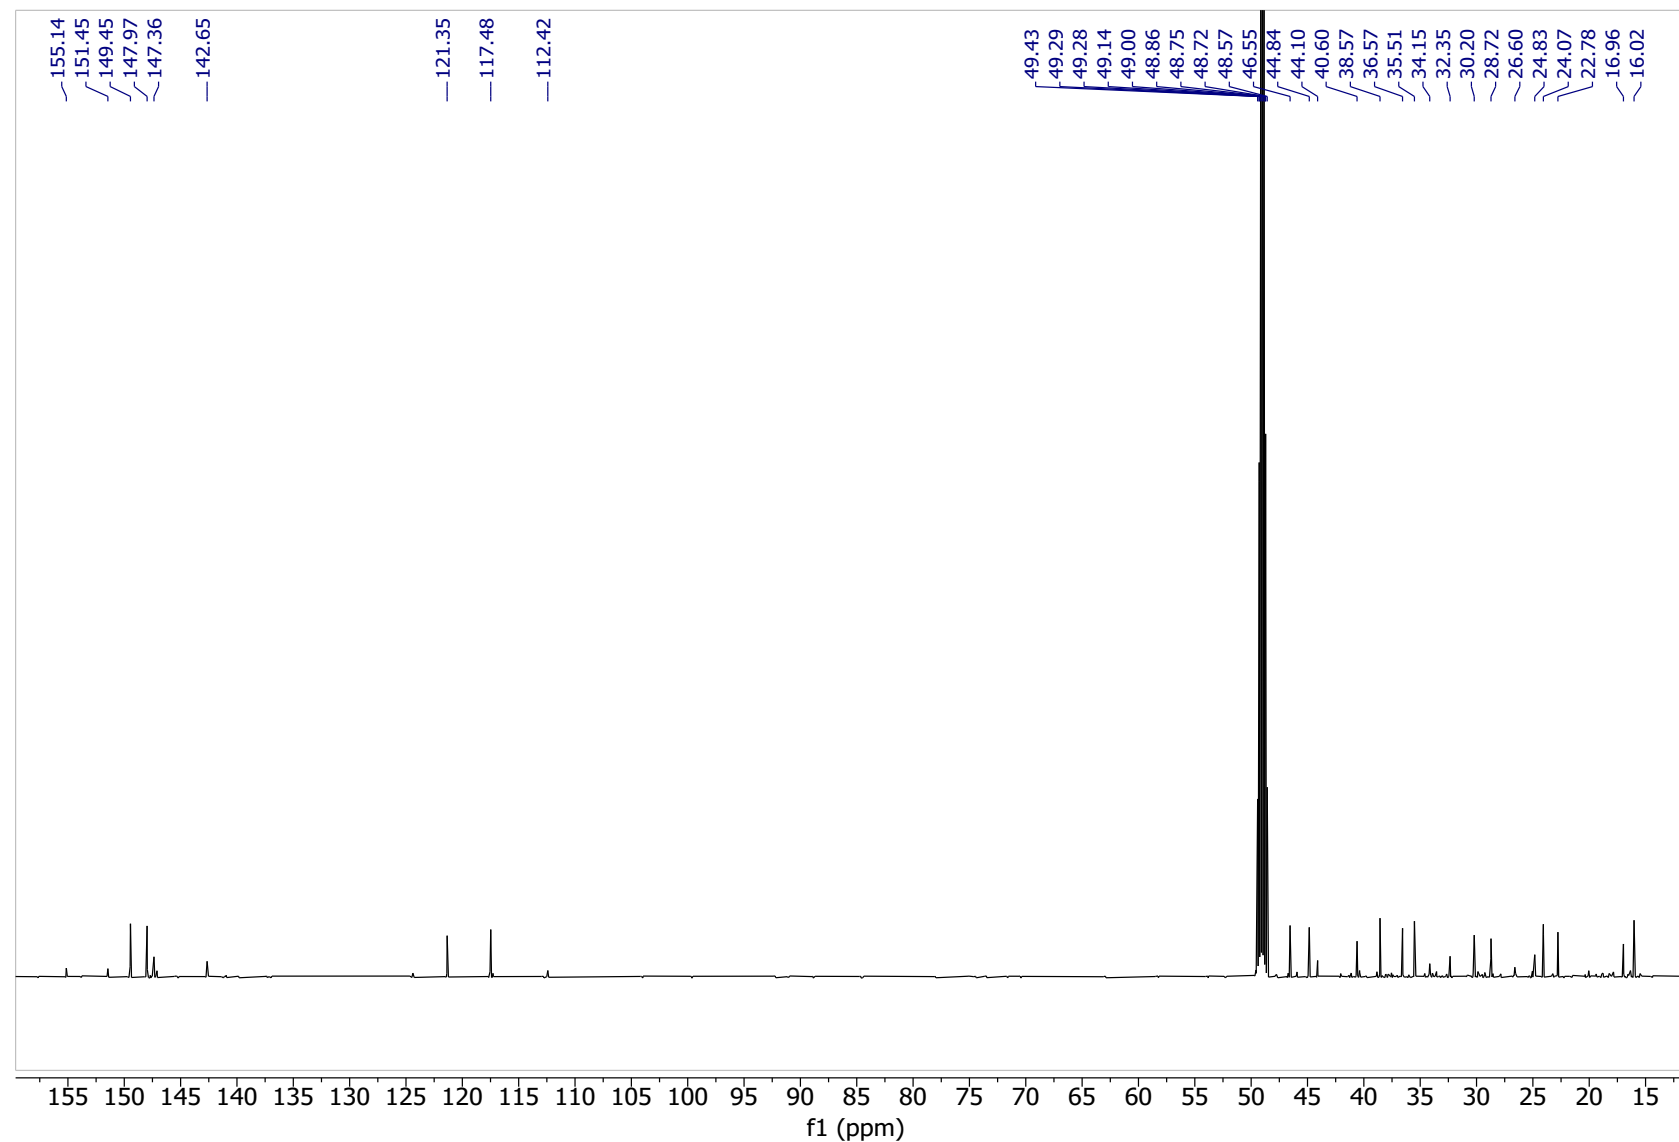

**Figure S2.**  $^{13}\text{C}$  NMR spectrum (150 MHz) of Agelasine W (1) in  $\text{CD}_3\text{OD}$ .

179B034\_46.5.ser

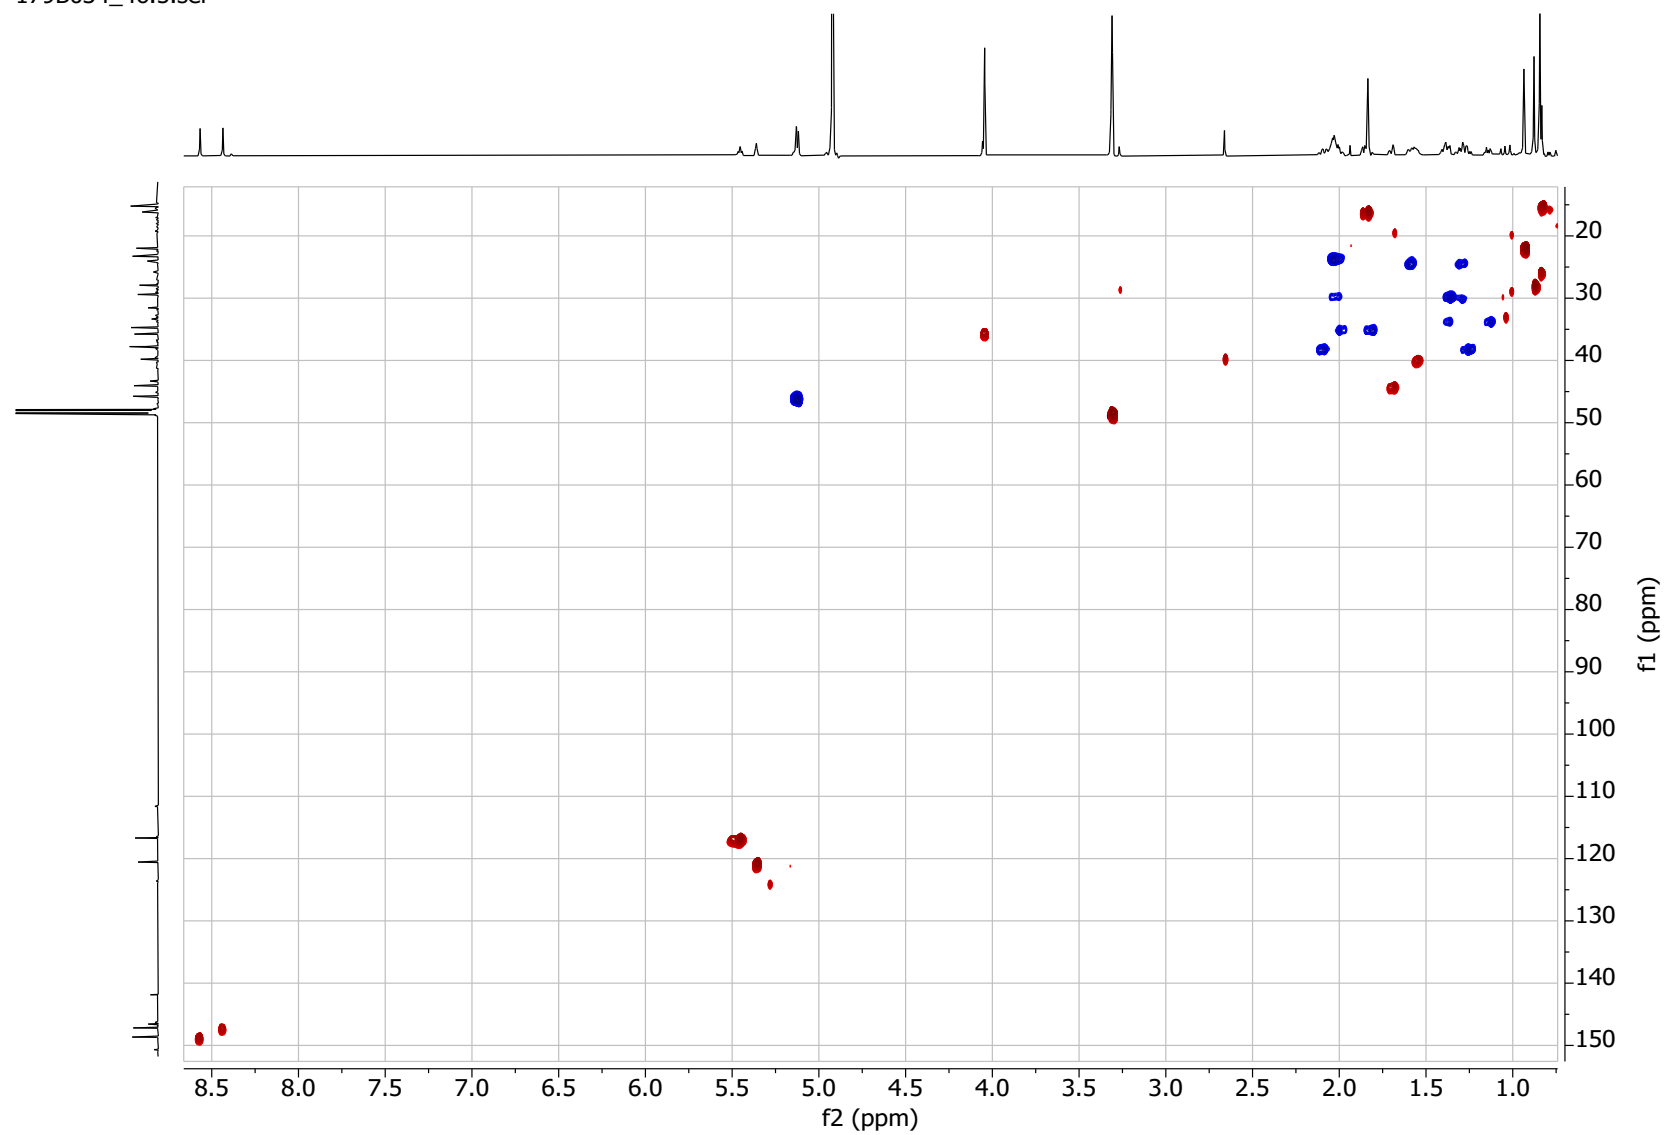

**Figure S3.** HSQC spectrum of Agelasine W (1) in  $\text{CD}_3\text{OD}$ .

179B034\_46.7.ser

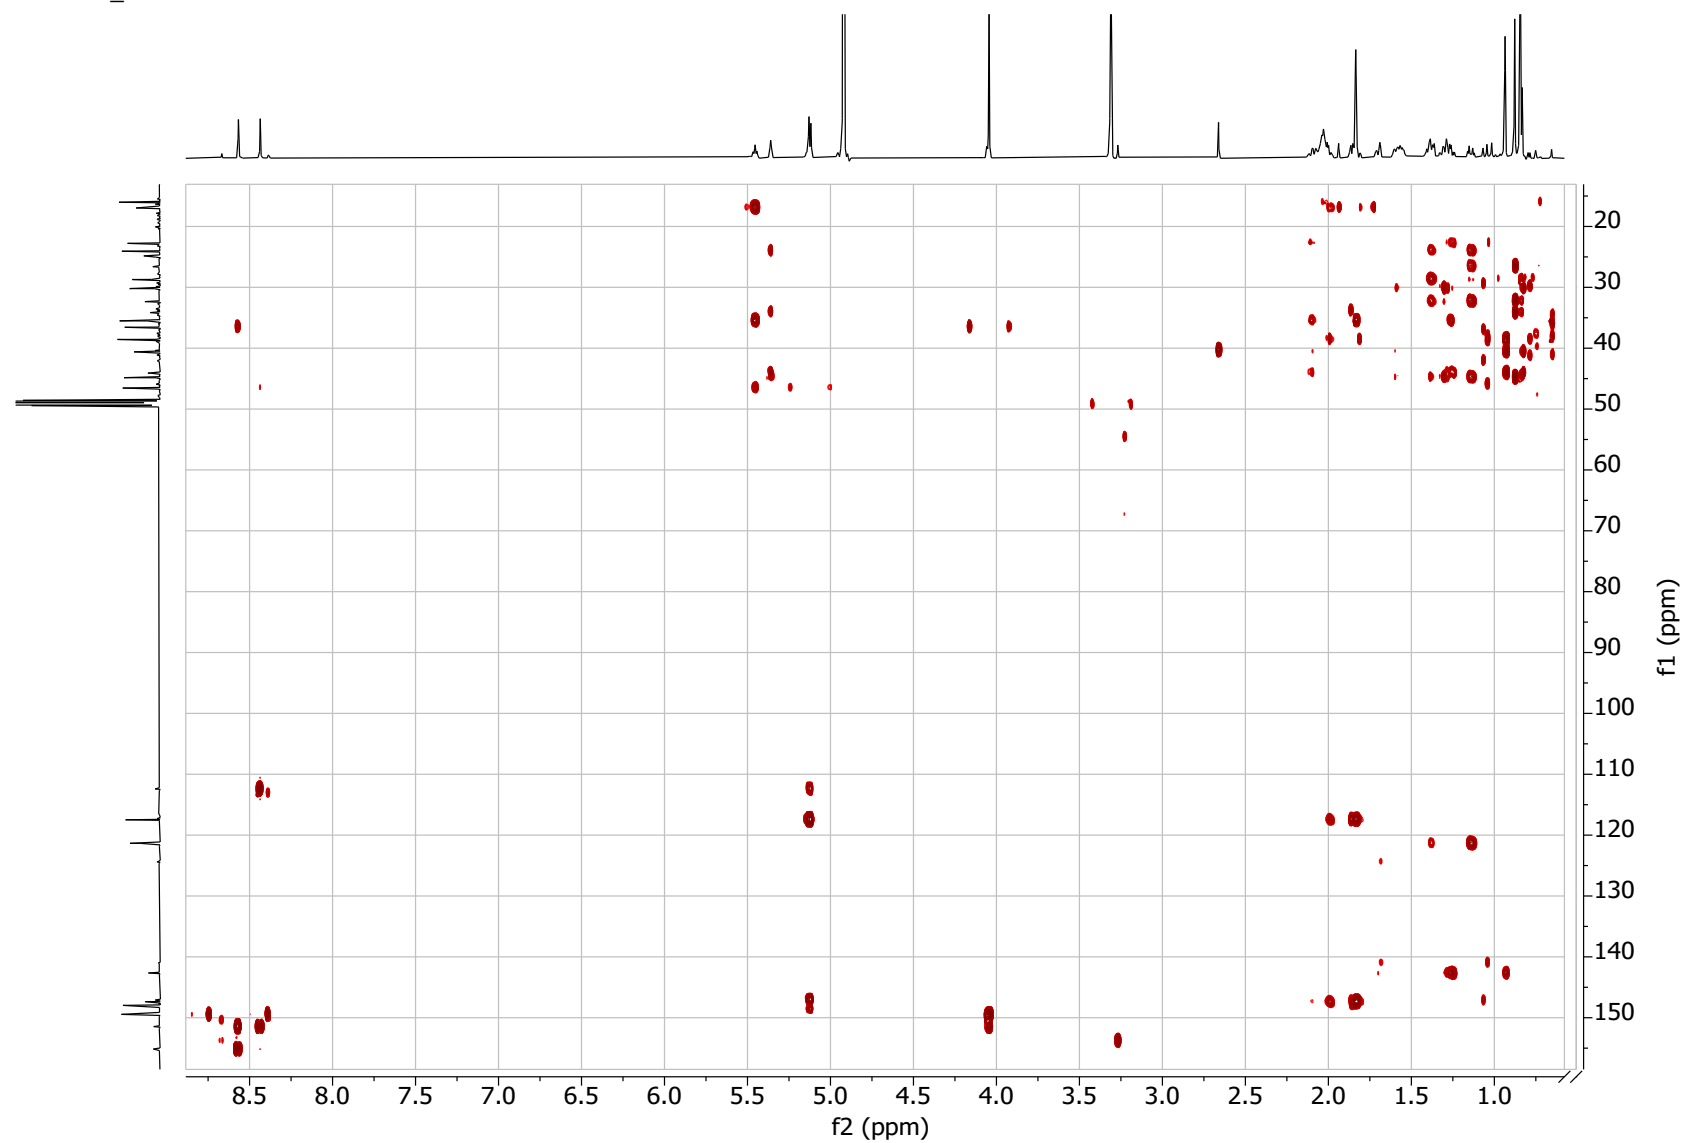

**Figure S4.** HMBC spectrum of Agelasine W (**1**) in  $\text{CD}_3\text{OD}$ .

179B034\_46.6.ser

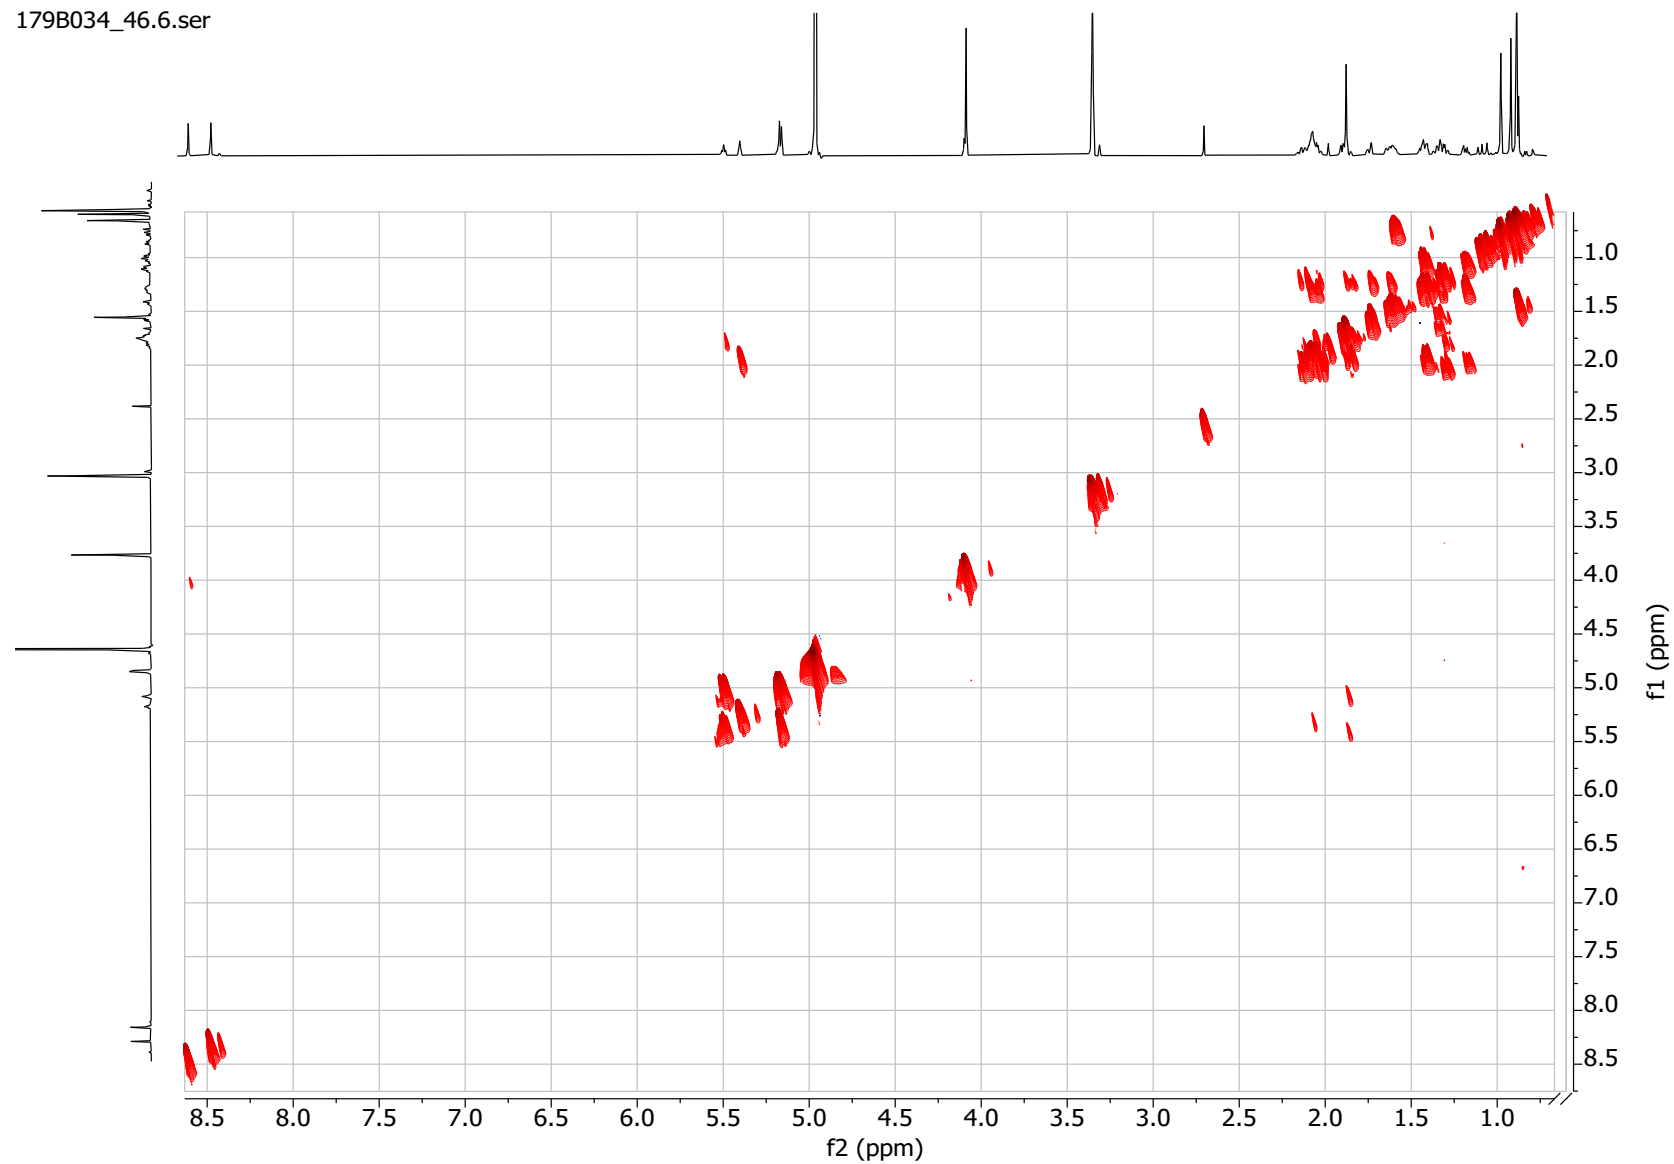

**Figure S5.** COSY spectrum of Agelasine W (**1**) in CD<sub>3</sub>OD.

1/9B034\_46.9.ser

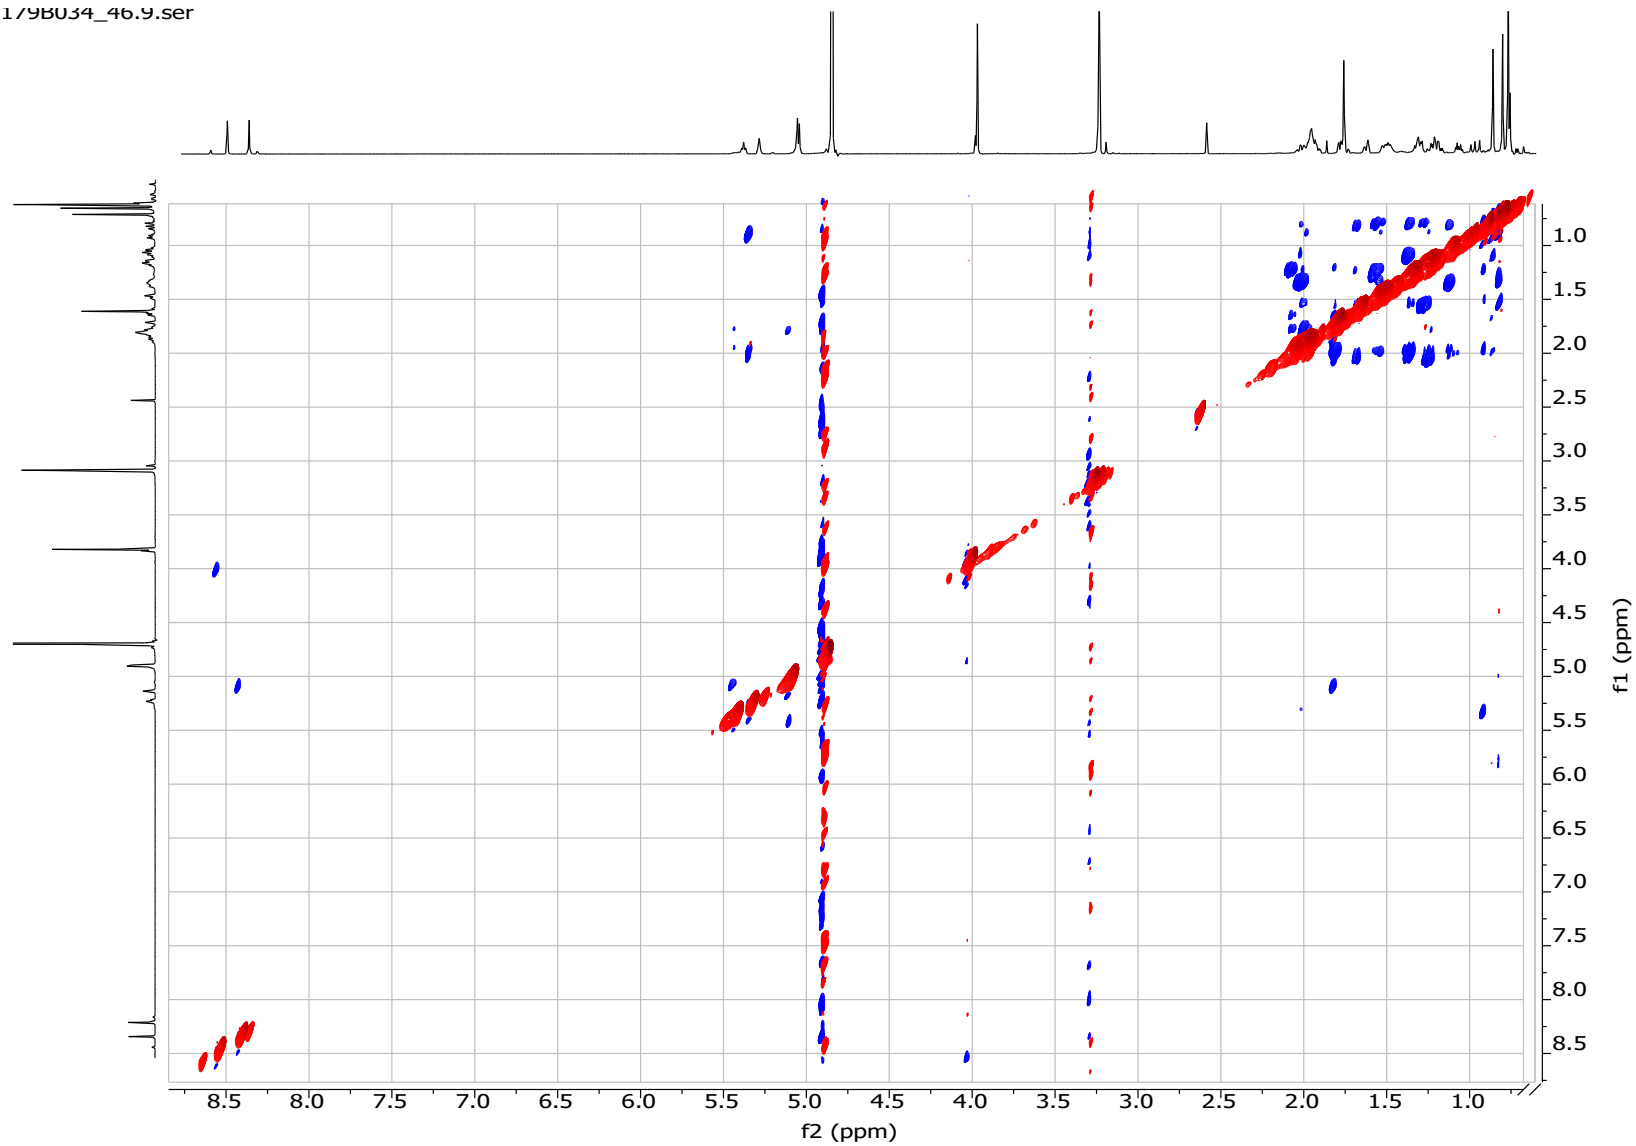

**Figure S6.** NOESY spectrum of Agelaine W (**1**) in CD<sub>3</sub>OD.

# Analysis Report

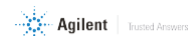

## Sample Information

|                       |              |                           |                                                                                    |
|-----------------------|--------------|---------------------------|------------------------------------------------------------------------------------|
| <b>Name</b>           | 1798034-46   | <b>Data File Path</b>     | C:\Users\bokesch\l\Desktop\QTOF-DATAANALYSIS-ADMIN by HEID\B\W\102919\1798034-46.d |
| <b>Sample ID</b>      |              | <b>Acq. Time (Local)</b>  | 10/29/2019 8:47:47 AM (UTC-05:00)                                                  |
| <b>Instrument</b>     | Instrument 1 | <b>Method Path (Acq)</b>  | D:\MassHunter\Methods\FJA_SM_LowFlow.m                                             |
| <b>MS Type</b>        | QTOF         | <b>Version (Acq SW)</b>   | 6200 series TOF/6500 series Q-TOF B.09.00 (B9044.1 SP1)                            |
| <b>Inj. Vol. (ul)</b> | 1            | <b>IRM Status</b>         | Some ions missed                                                                   |
| <b>Position</b>       | Vial 16      | <b>Method Path (DA)</b>   |                                                                                    |
| <b>Plate Pos.</b>     |              | <b>Target Source Path</b> |                                                                                    |
| <b>Operator</b>       |              | <b>Result Summary</b>     |                                                                                    |

## Sample Chromatograms

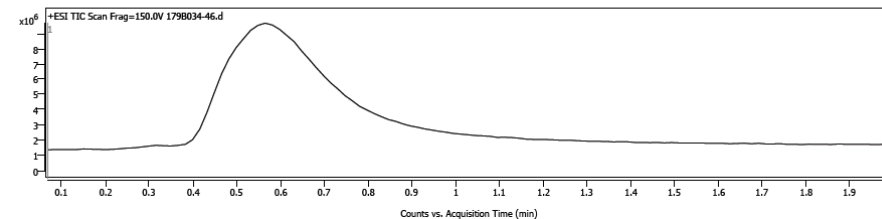

## Sample Spectra

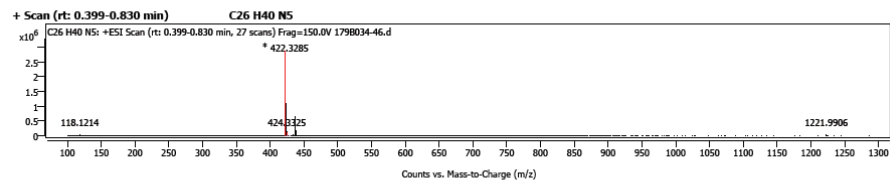

## Spectrum Identification Table

| Best ID Source | Name | Formula    | Species | m/z      | Diff (ppm) | CAS | Score | Score (Lib) | Score (DB) | Score (MFG) | Lib/DB |
|----------------|------|------------|---------|----------|------------|-----|-------|-------------|------------|-------------|--------|
| Yes MFG        |      | C26 H40 N5 | M+      | 422.3285 | 0.31       |     | 84.22 |             |            | 84.22       |        |

MassHunter Qual 10.0  
(End of Report)

**Figure S7.** HRESIMS spectrum of Agelasine W (1).

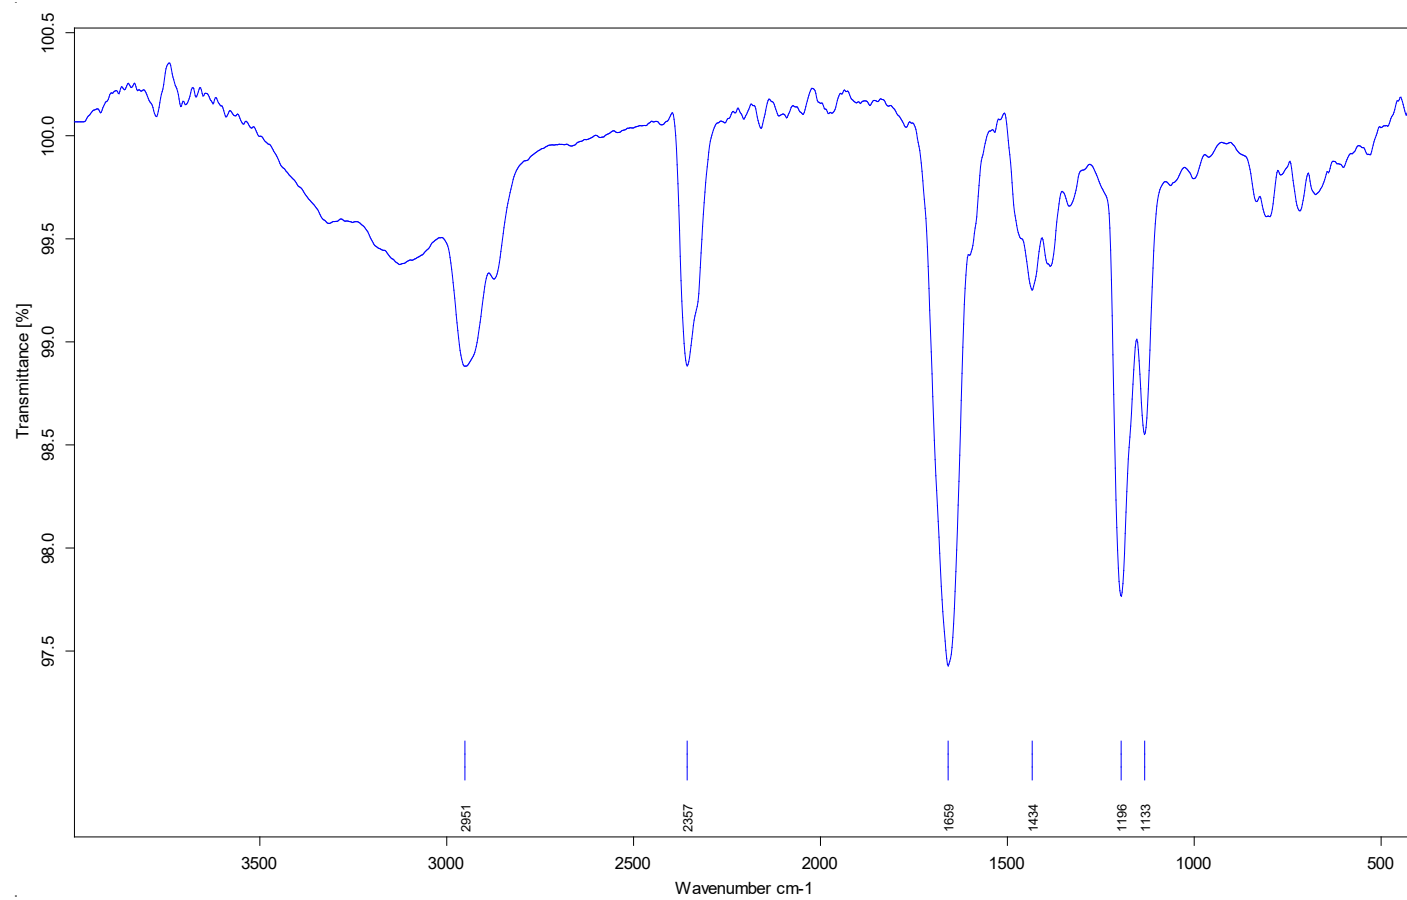

**Figure S8.** IR spectrum (neat) of Agelasine W (1).

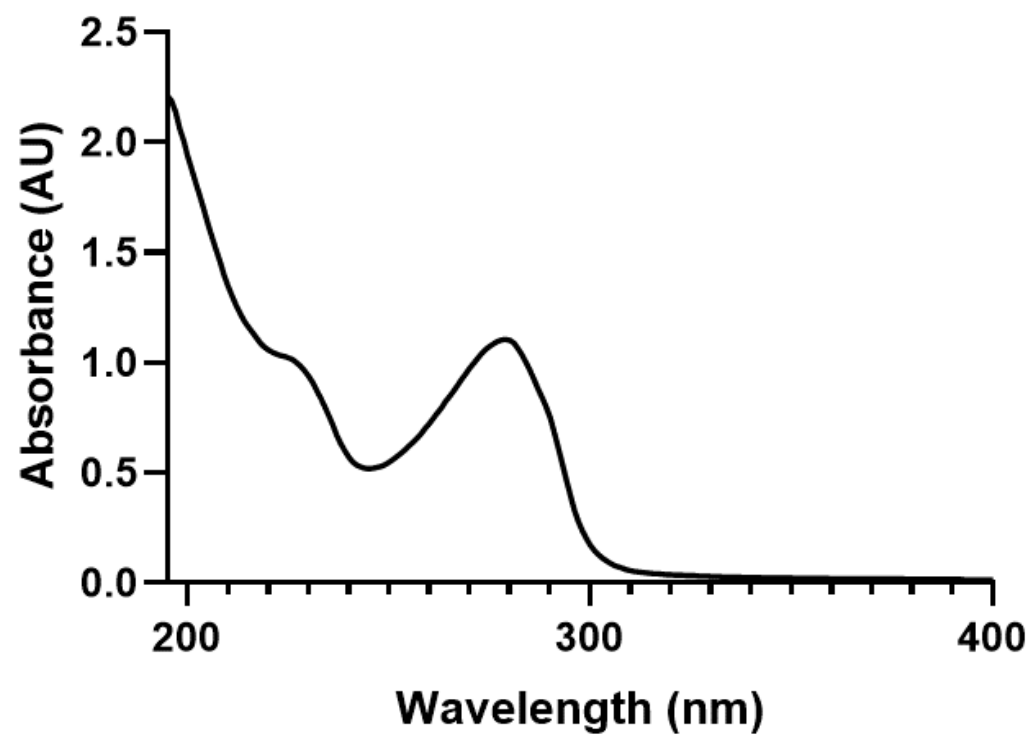

**Figure S9.** UV spectrum of Agelasine W (1).



1/9B034\_49.1.tid

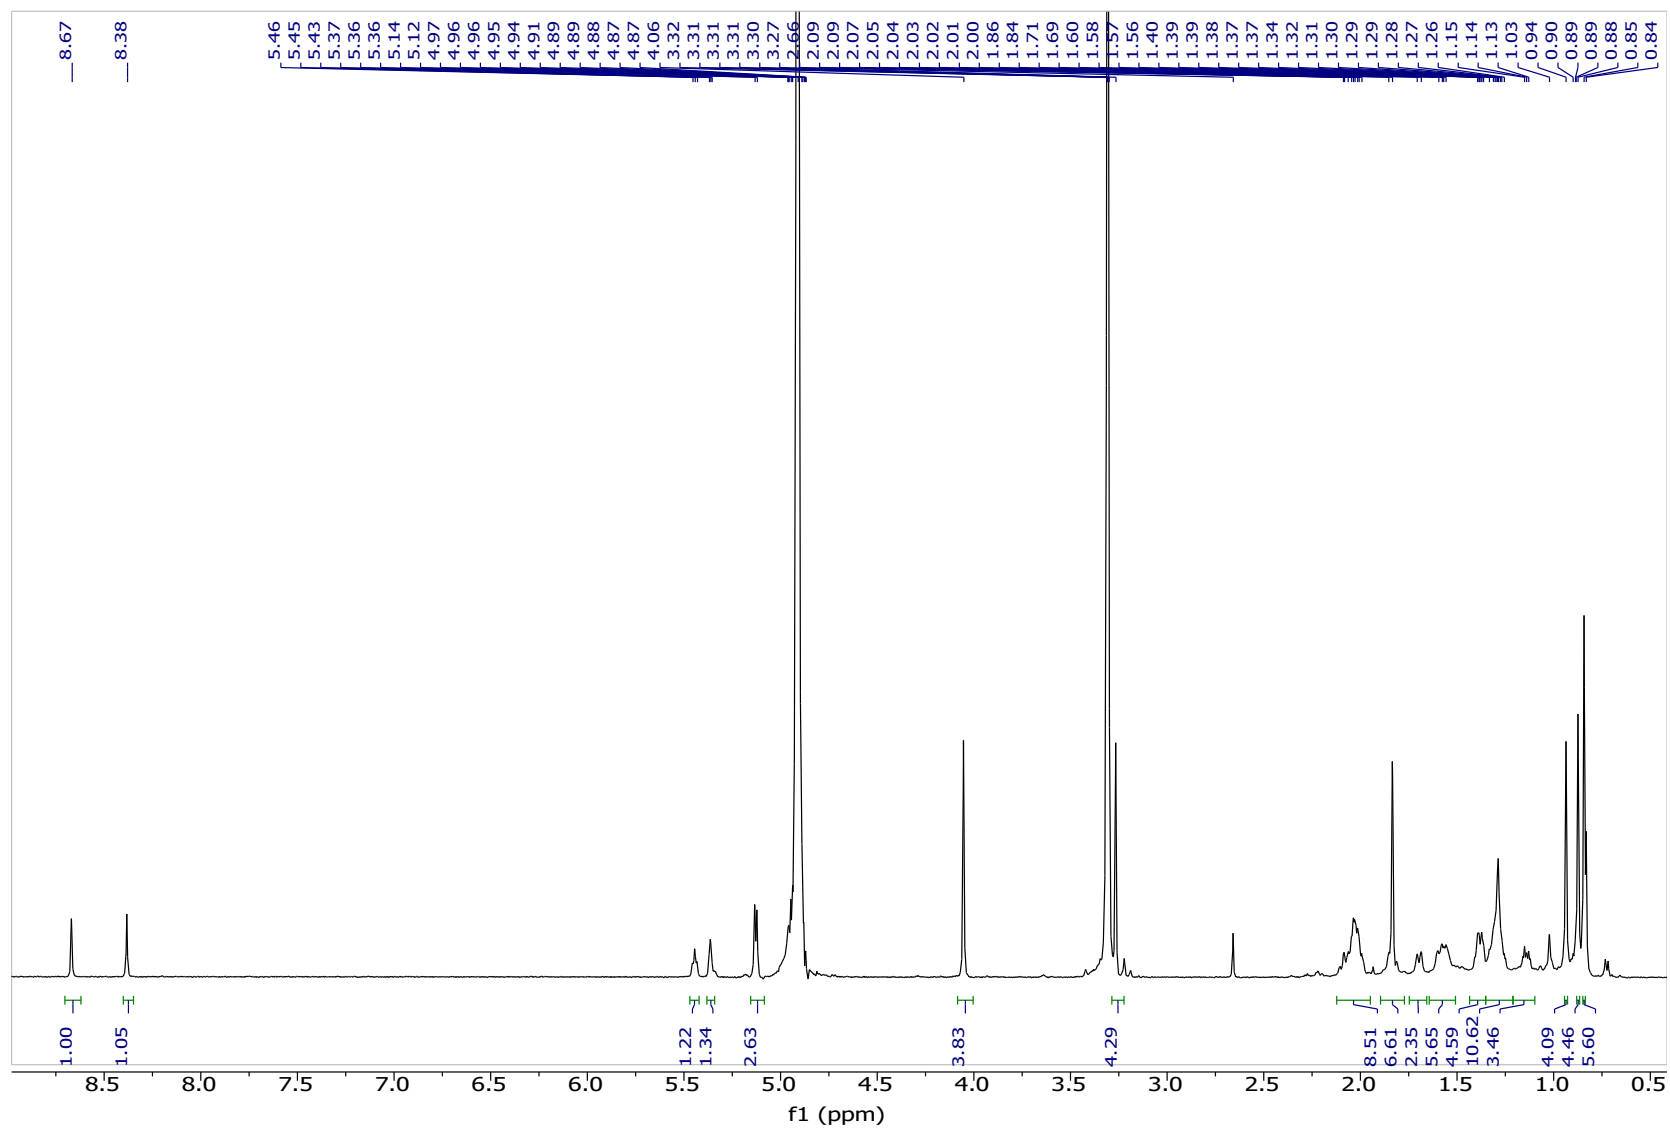

**Figure S10.**  $^1\text{H}$  NMR spectrum (600 MHz) of Agelasine X (**2**) in  $\text{CD}_3\text{OD}$ .

179B034\_49.5.tif

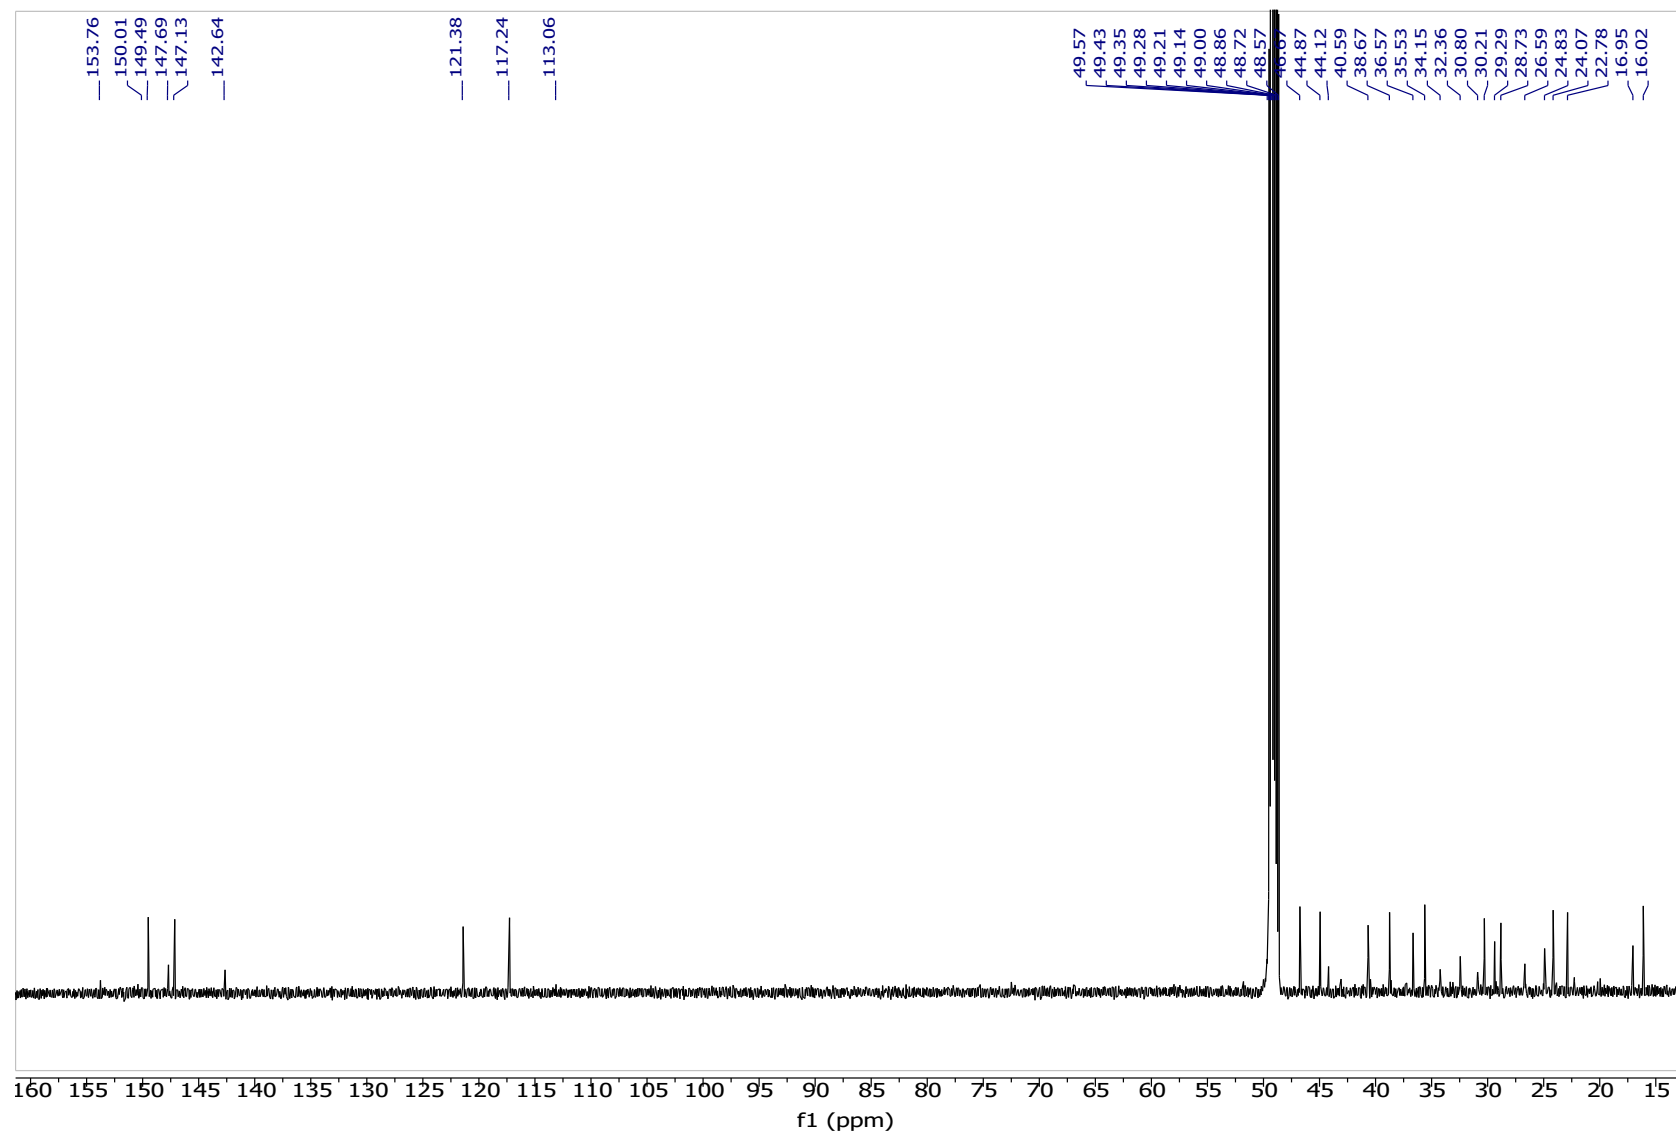

**Figure S11.** <sup>13</sup>C NMR spectrum (150 MHz) of Agelasine X (**2**) in CD<sub>3</sub>OD.

179B034\_49.2.ser

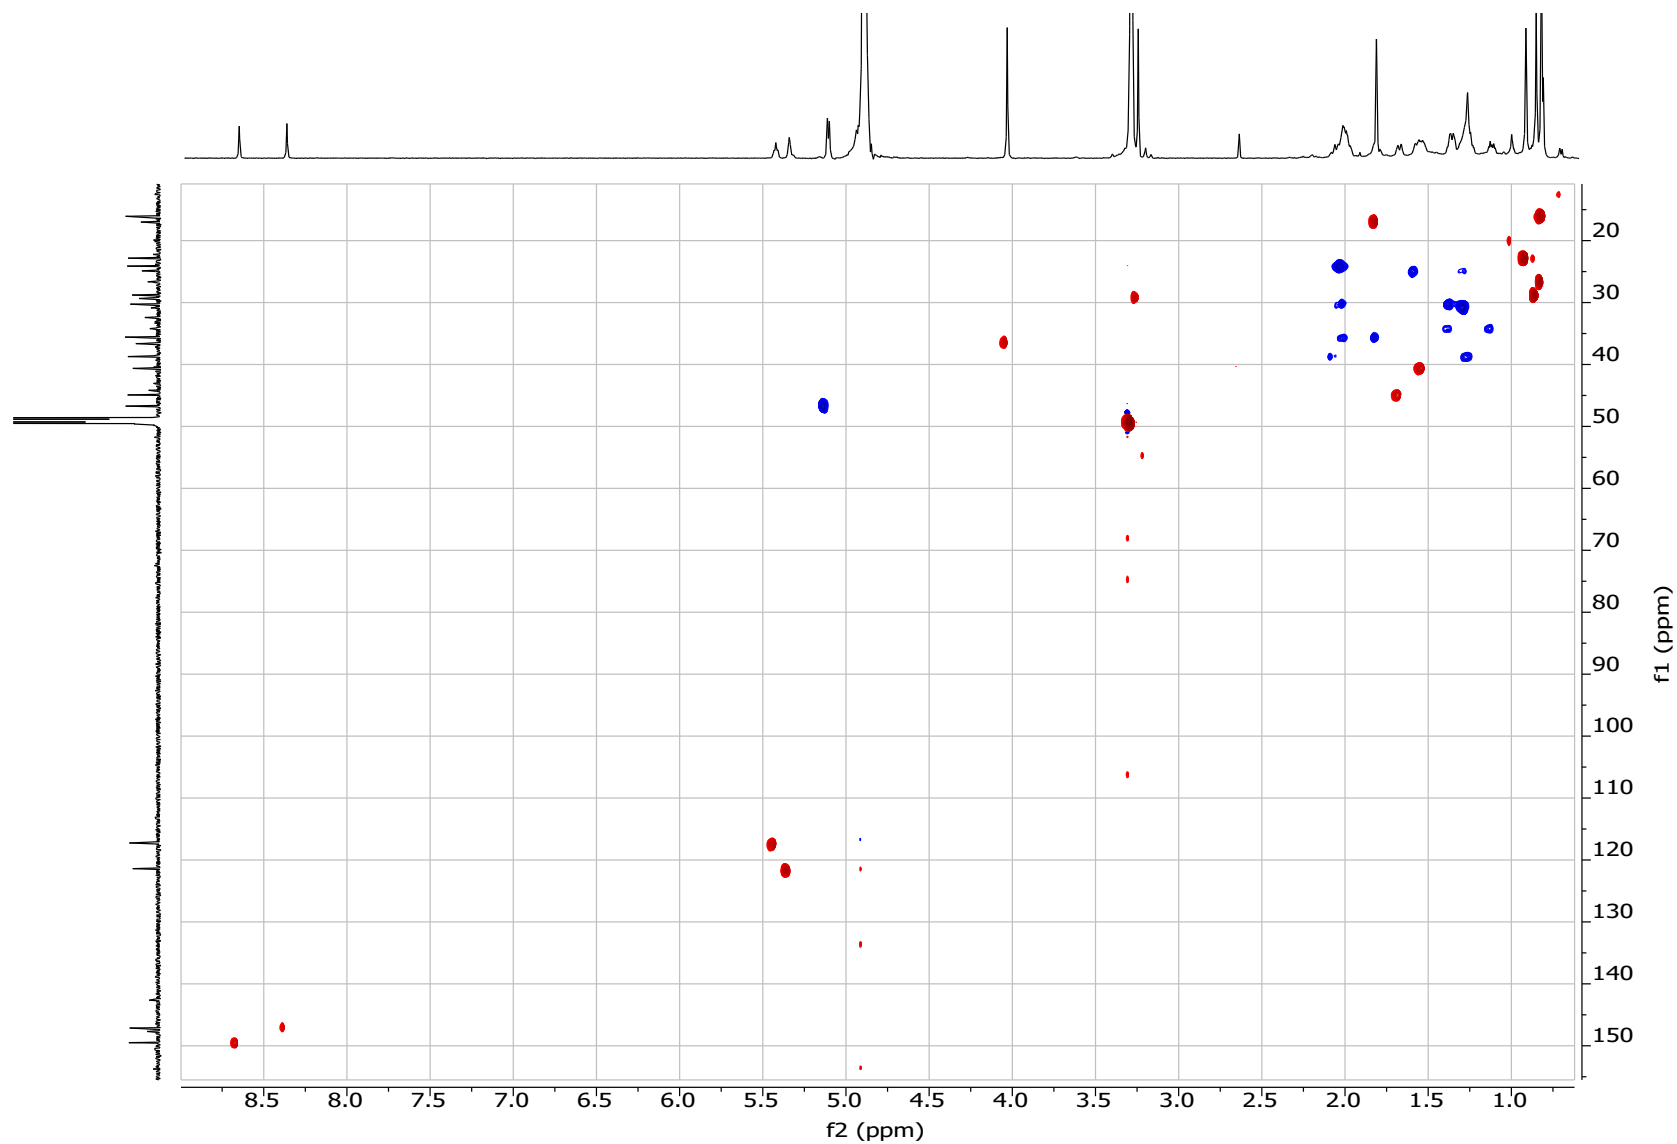

**Figure S12.** HSQC spectrum of Agelasine X (**2**) in  $\text{CD}_3\text{OD}$ .

1/9B034\_49.4.ser

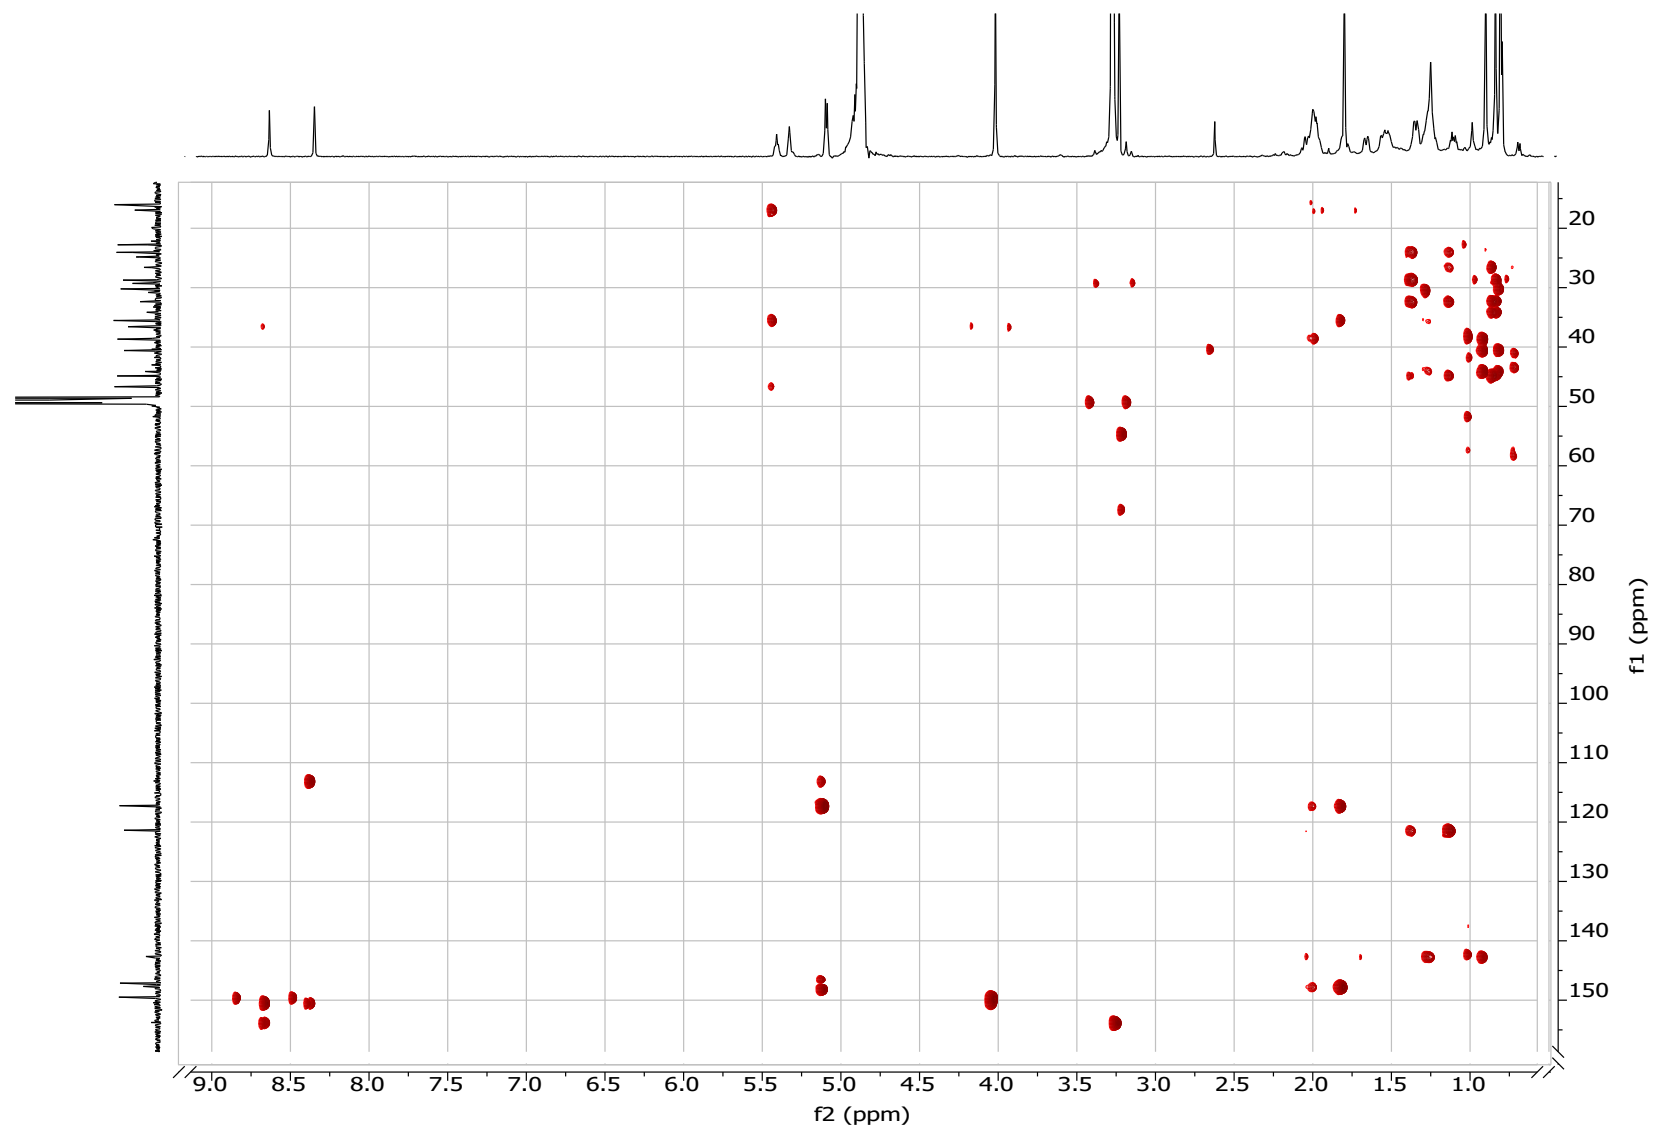

**Figure S13.** HMBC spectrum of Agelasine X (**2**) in CD<sub>3</sub>OD.

**Figure S14.** COSY spectrum of Agelasine X (**2**) in CD<sub>3</sub>OD.

## Analysis Report

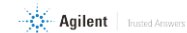

### Sample Information

|                       |              |                           |                                                                                                                |
|-----------------------|--------------|---------------------------|----------------------------------------------------------------------------------------------------------------|
| <b>Name</b>           | 1798034-49   | <b>Data File Path</b>     | C:\Users\bokesch\ Desktop\QTOF-DATAANALYSIS-ADMIN by HEIDIB\We\102919\1798034-49.d                             |
| <b>Sample ID</b>      |              | <b>Acq. Time (Local)</b>  | 10/29/2019 8:58:41 AM (UTC-05:00)                                                                              |
| <b>Instrument</b>     | Instrument 1 | <b>Method Path (Acq)</b>  | D:\MassHunter\Methods\FIA_SM_LowFlow.m                                                                         |
| <b>MS Type</b>        | QTOF         | <b>Version (Acq SW)</b>   | 6200 series TOF/6500 series Q-TOF B.09.00 (B9044.1 SP1)                                                        |
| <b>Inj. Vol. (ul)</b> | 1            | <b>IRM Status</b>         | Some ions missed                                                                                               |
| <b>Position</b>       | Vial 18      | <b>Method Path (DA)</b>   | C:\Users\bokesch\ Desktop\QTOF-DATAANALYSIS-ADMIN by HEIDIB\We\102919\1798034-49.d\Results\Qual\Version4\IRB.m |
| <b>Plate Pos.</b>     |              | <b>Target Source Path</b> |                                                                                                                |
| <b>Operator</b>       |              | <b>Result Summary</b>     |                                                                                                                |

### Sample Chromatograms

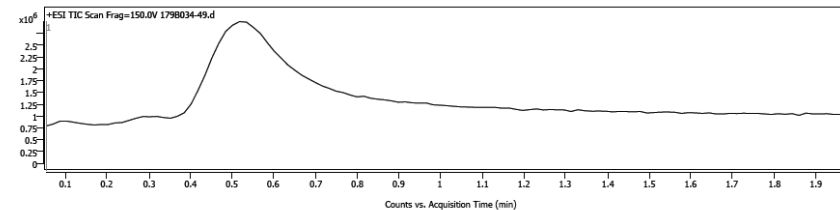

### Sample Spectra

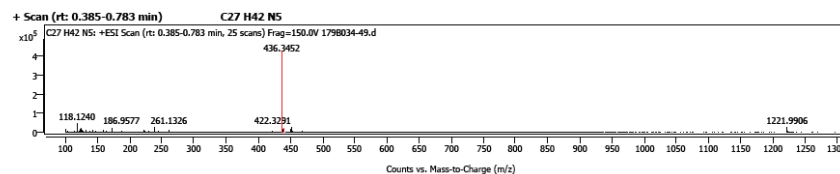

### Spectrum Identification Table

| Best ID Source | Name       | Formula | Species | m/z      | Diff (ppm) | CAS | Score | Score (Lib) | Score (DB) | Score (MPG) | Lib/DB |
|----------------|------------|---------|---------|----------|------------|-----|-------|-------------|------------|-------------|--------|
| Yes: MPG       | C27 H42 N5 |         | M+      | 436.3452 | 3.76       |     | 92.33 |             |            | 92.33       |        |

MassHunter Qual 10.0  
(End of Report)

**Figure S15.** HRESIMS spectrum of Agelasine X (2).

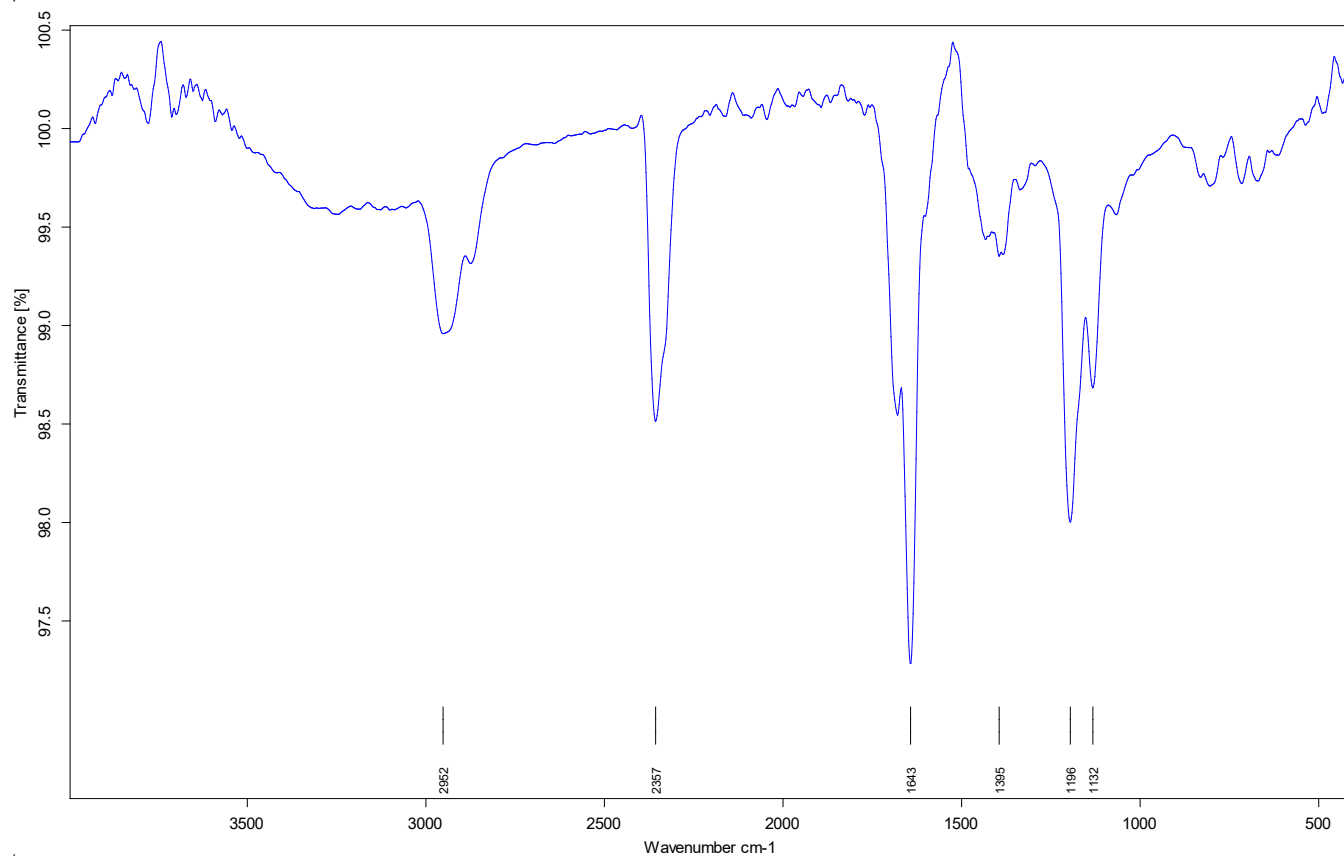

**Figure S16.** IR spectrum (neat) of Agelazine X (**2**).

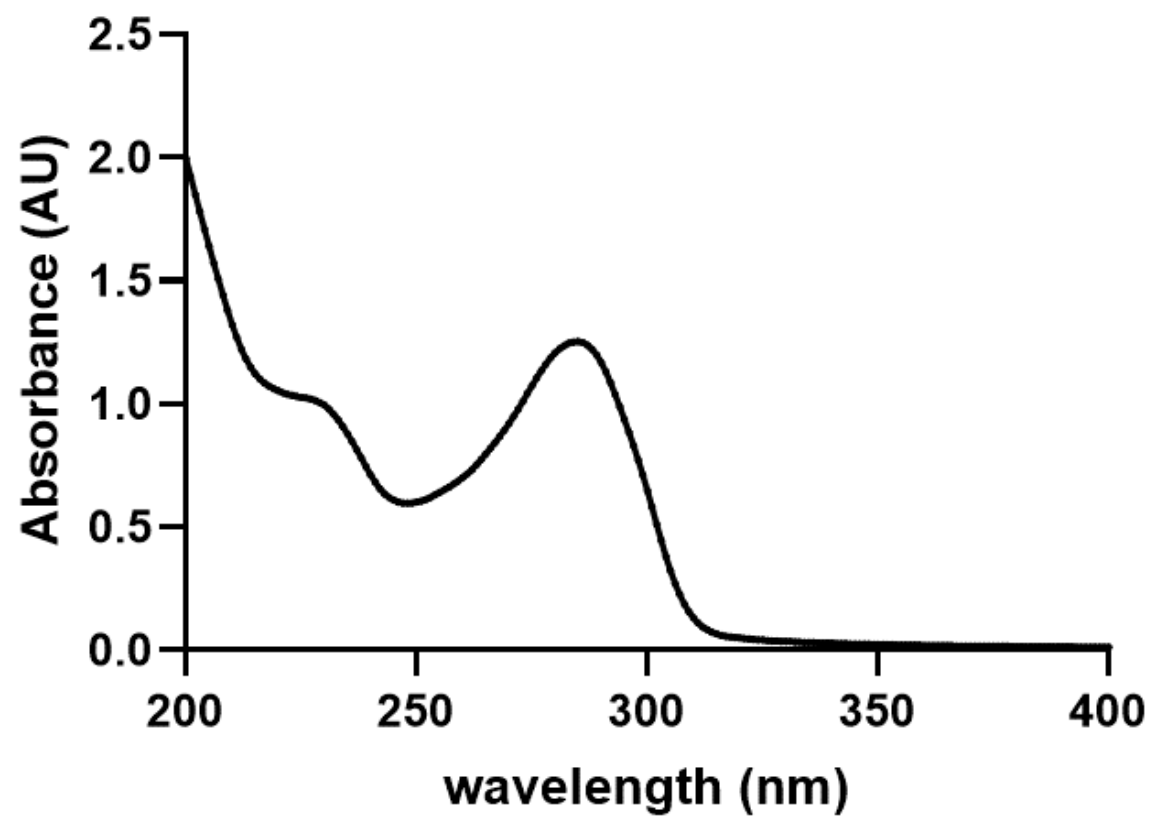

**Figure S17.** UV spectrum of Agelasine X (2).



1/9B034\_4/.1.tif

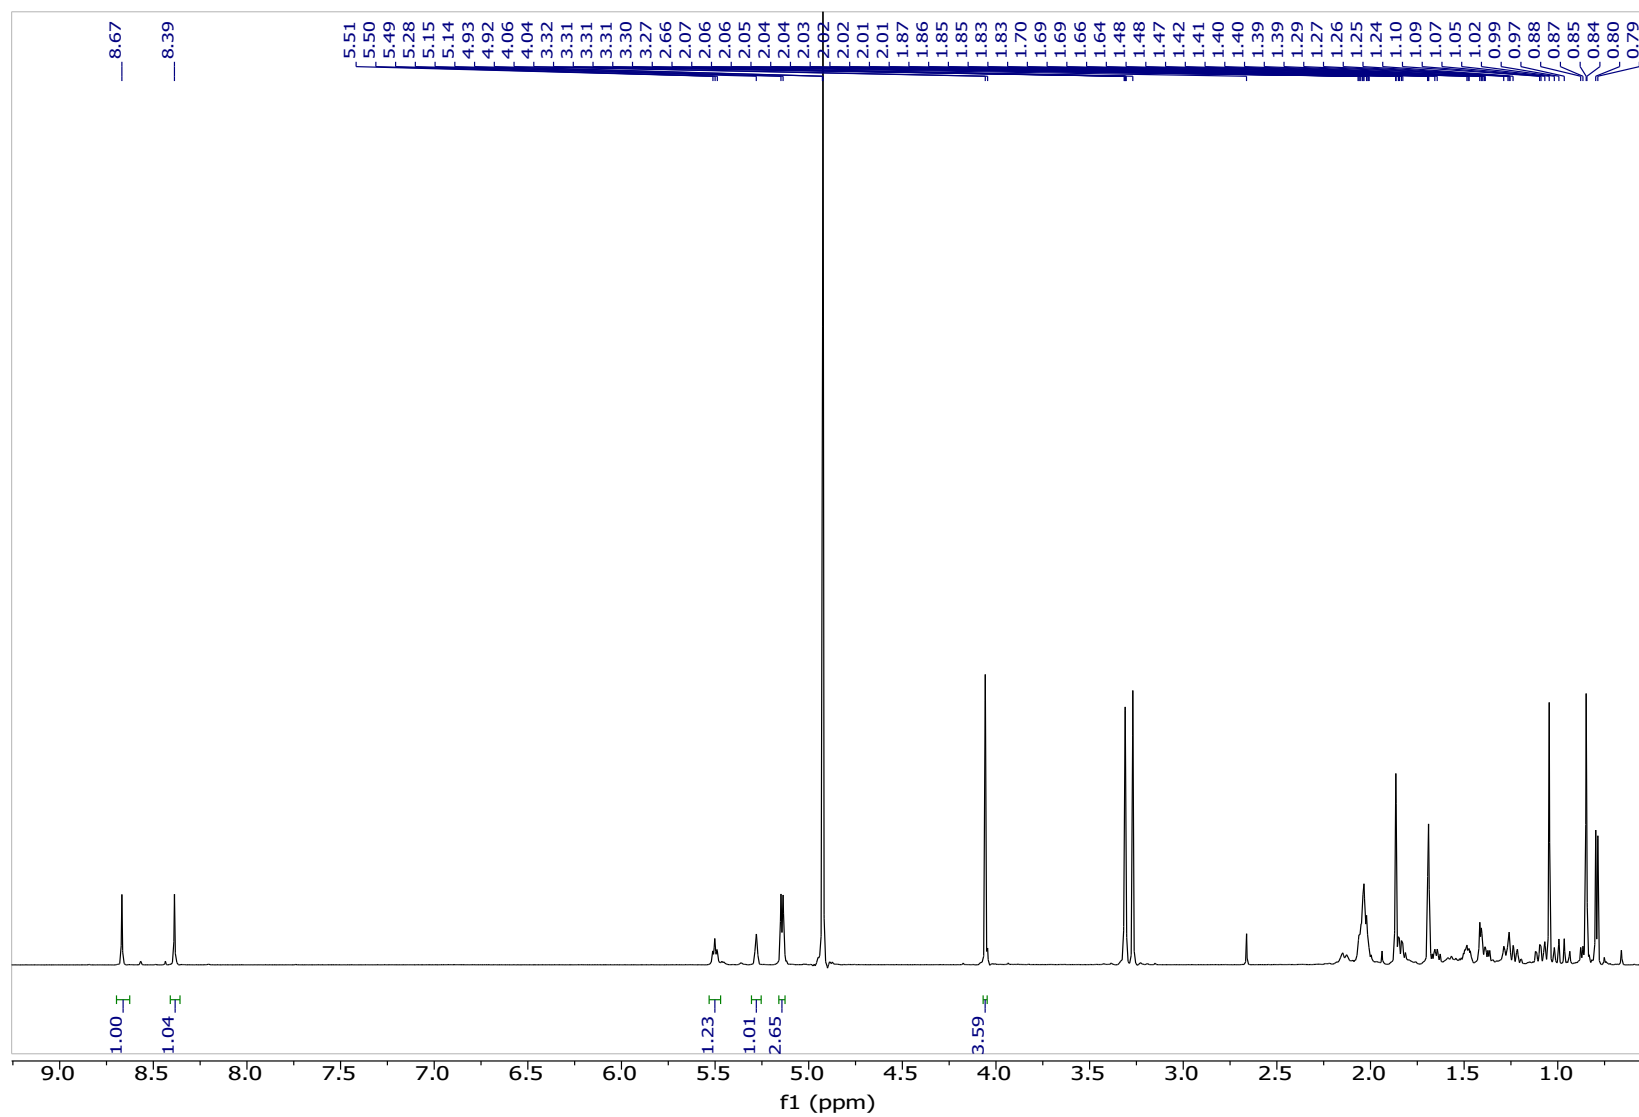

**Figure S18.** <sup>1</sup>H NMR spectrum (600 MHz) of Agelasine Y (3) in CD<sub>3</sub>OD.

1/9B034\_47.8.tif

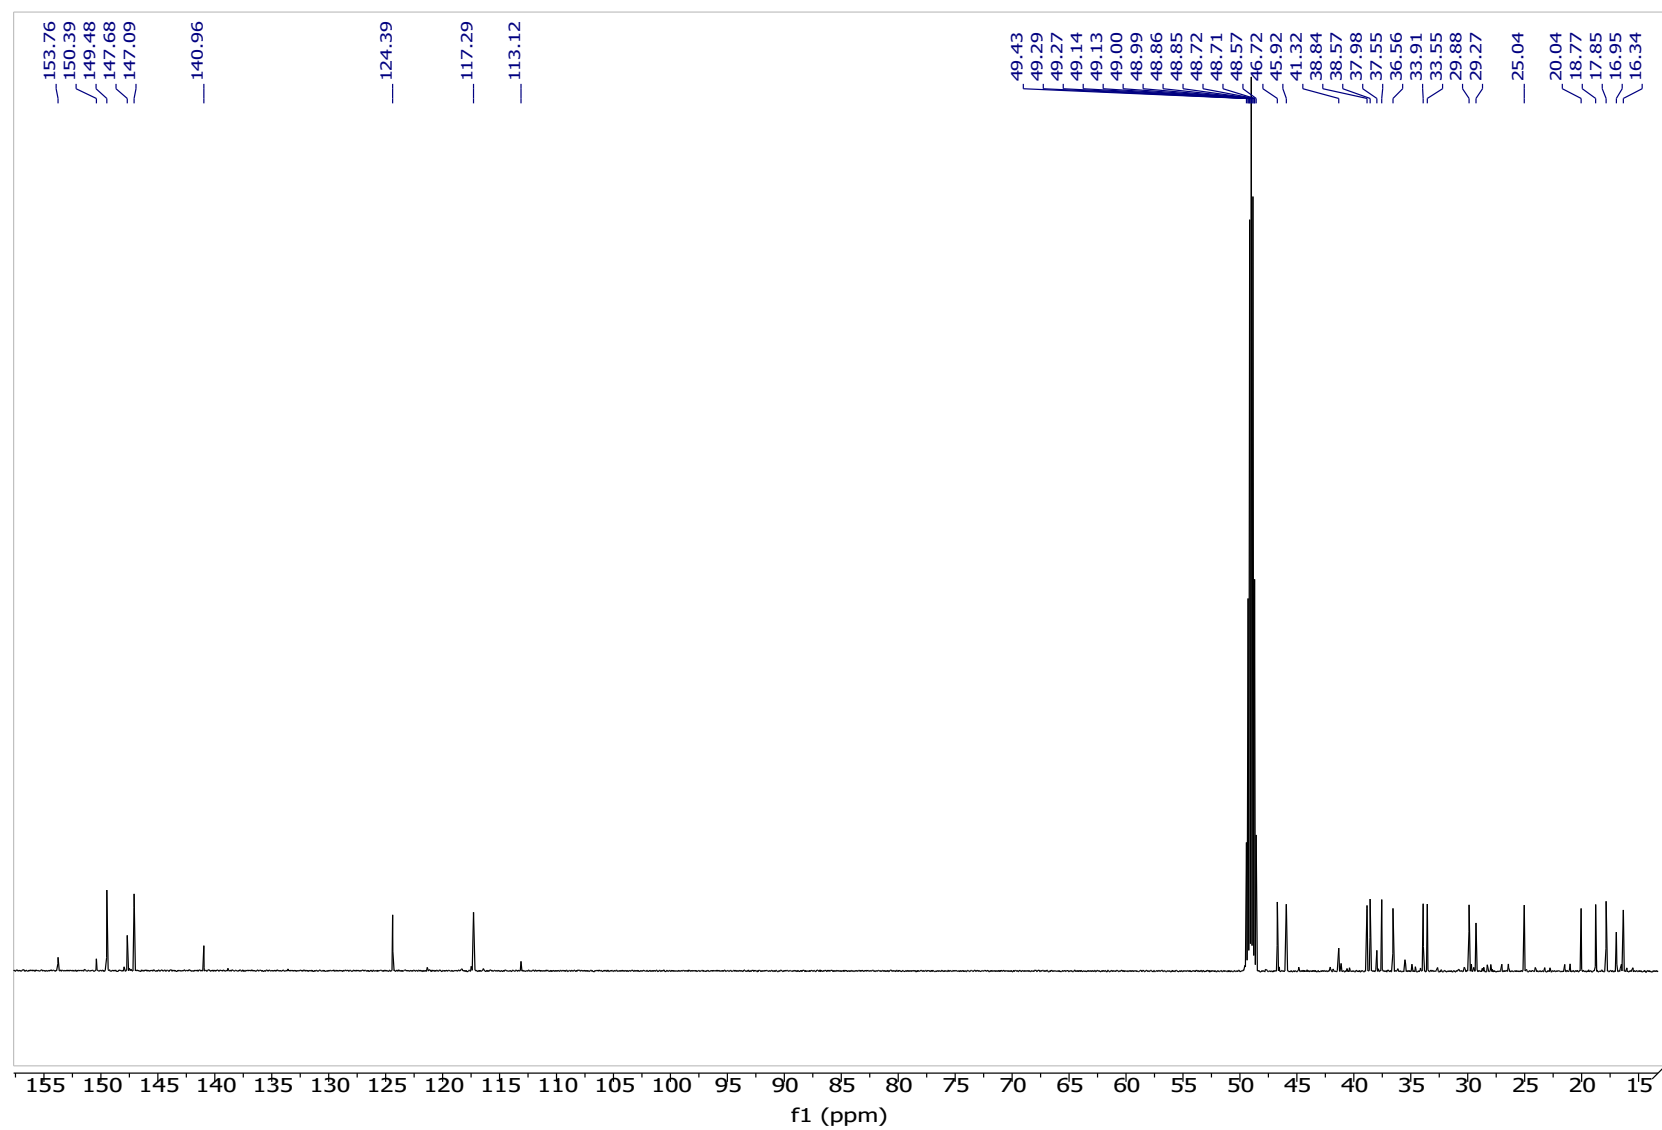

**Figure S19.** <sup>13</sup>C NMR spectrum (150 MHz) of Agelasine Y (**3**) in CD<sub>3</sub>OD.

1/9B034\_47.5.ser

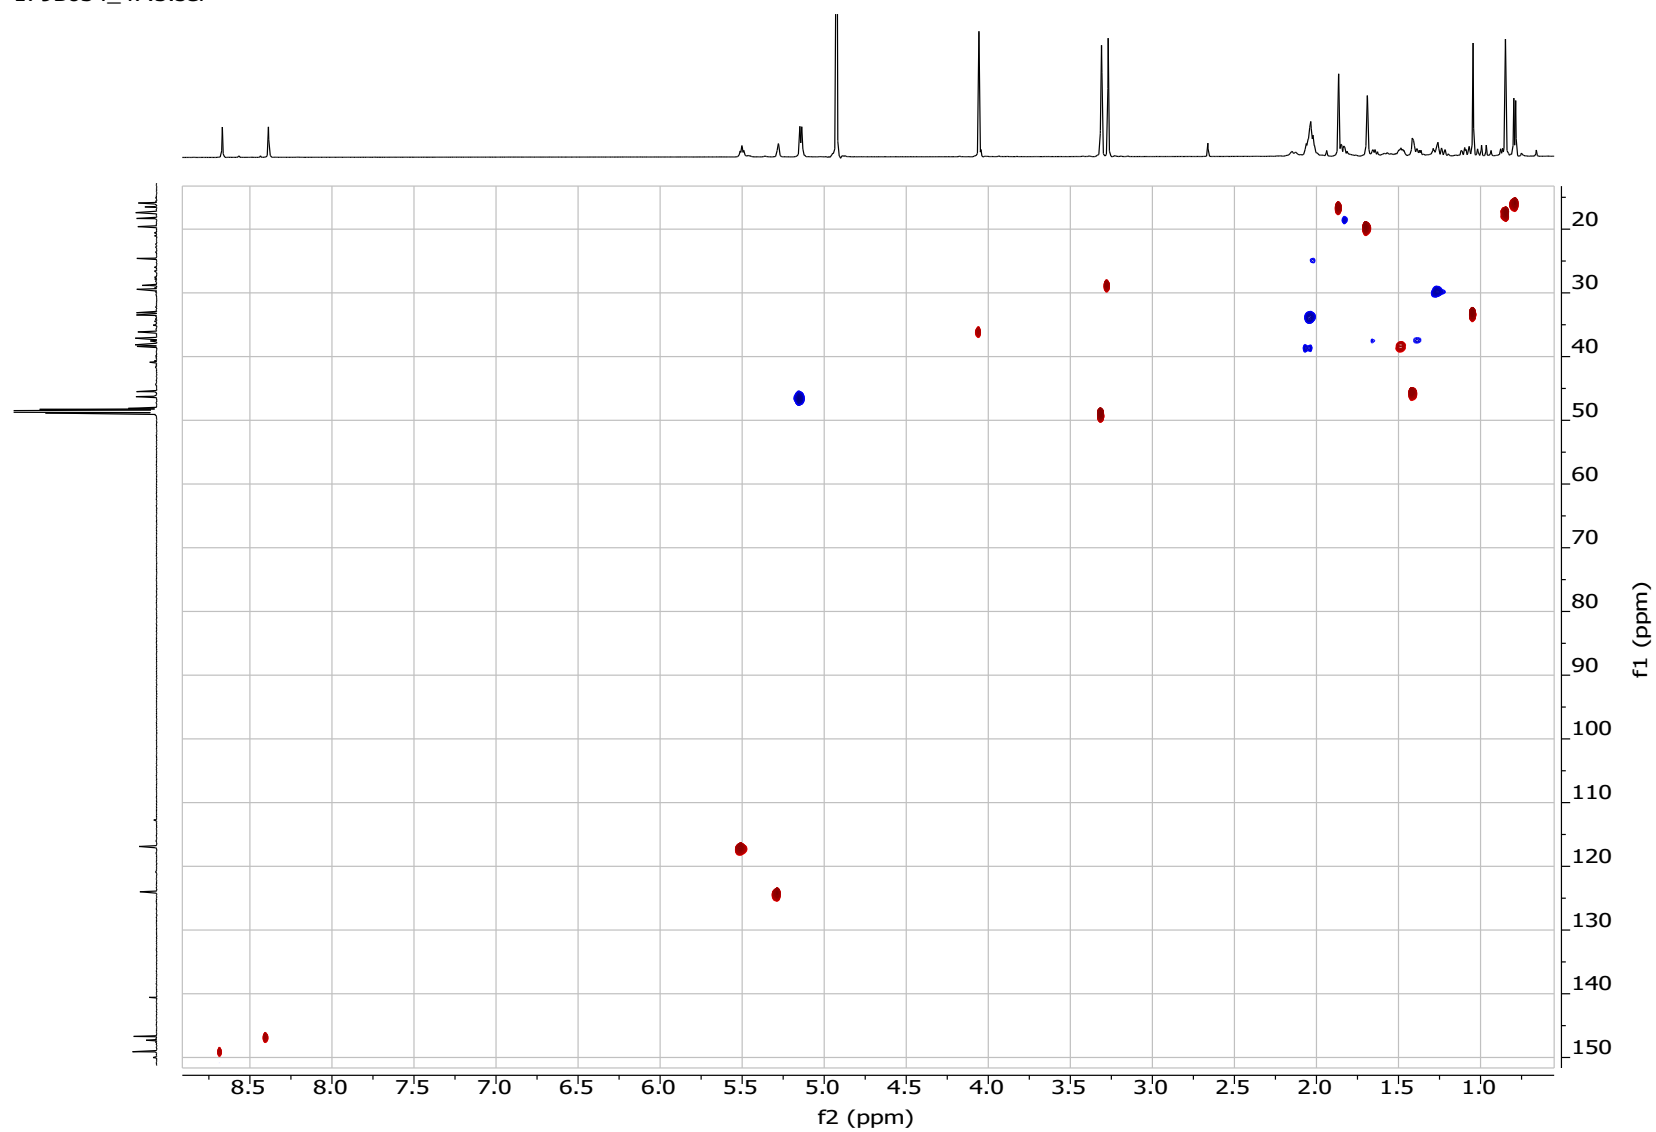

**Figure S20.** HSQC spectrum of Agelaine Y (**3**) in  $\text{CD}_3\text{OD}$ .

1/9B034\_47/.ser

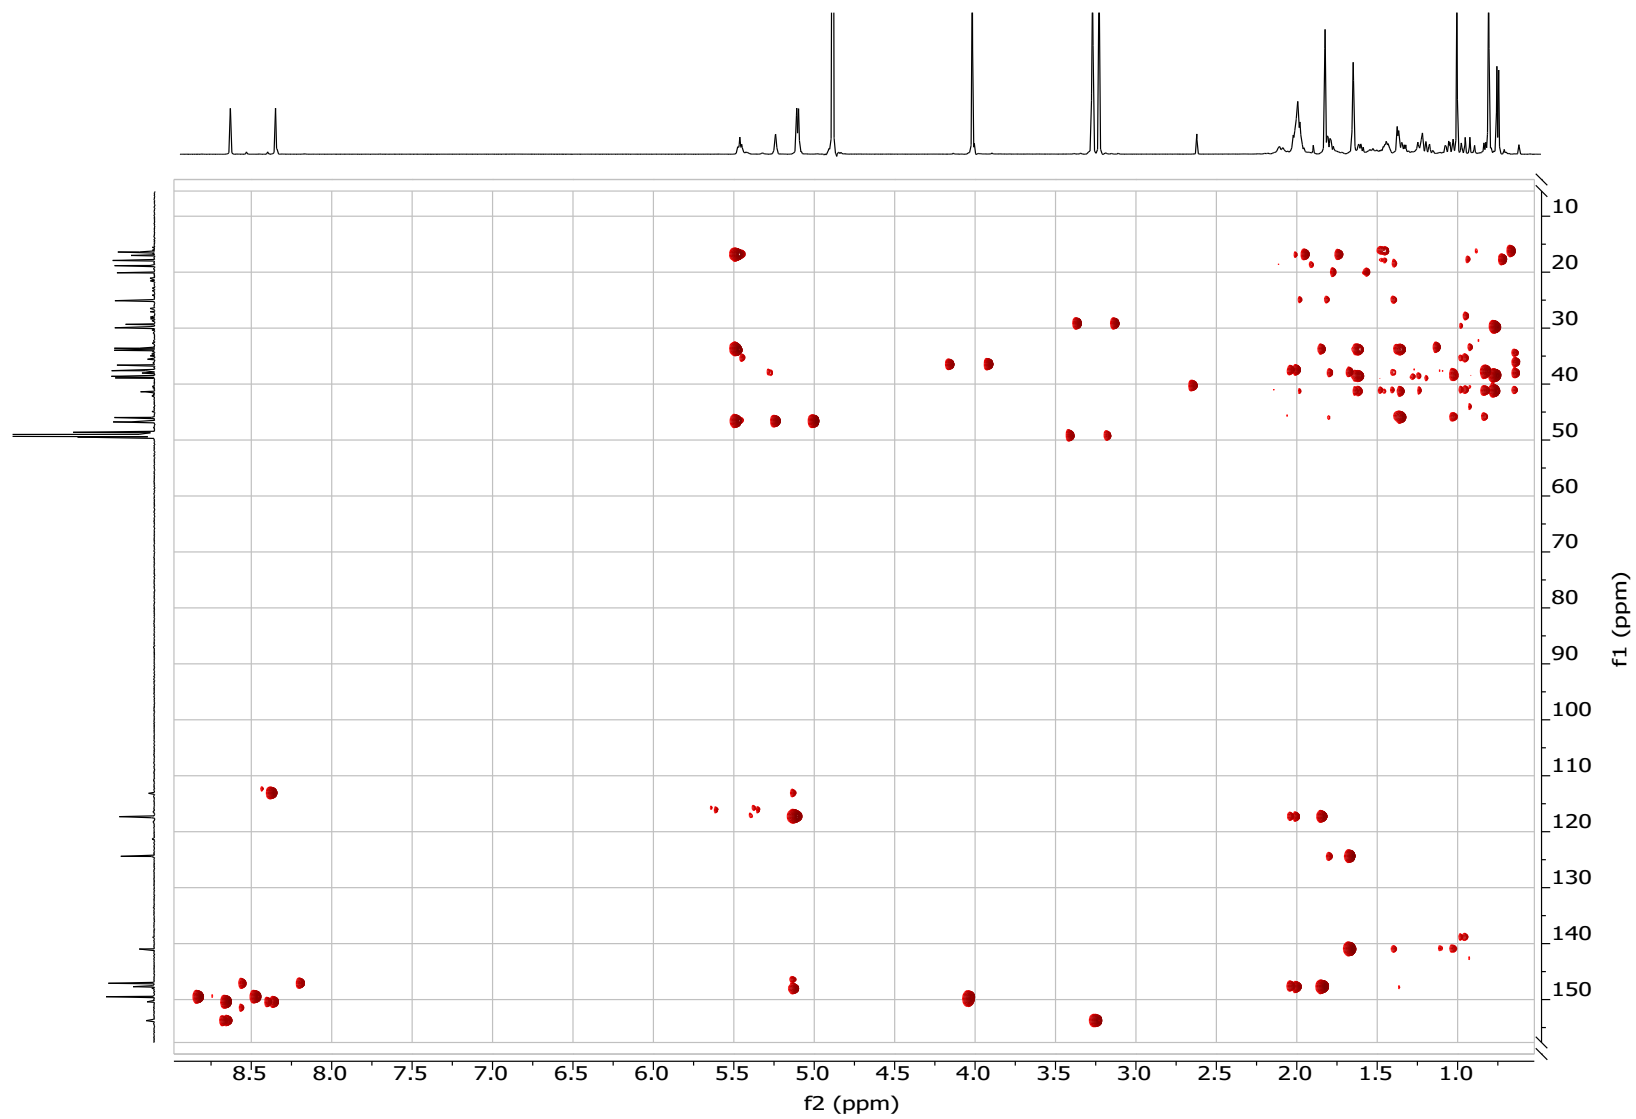

**Figure S21.** HMBC spectrum of Agelastine Y (**3**) in  $\text{CD}_3\text{OD}$ .

1/9B034\_47.b.ser

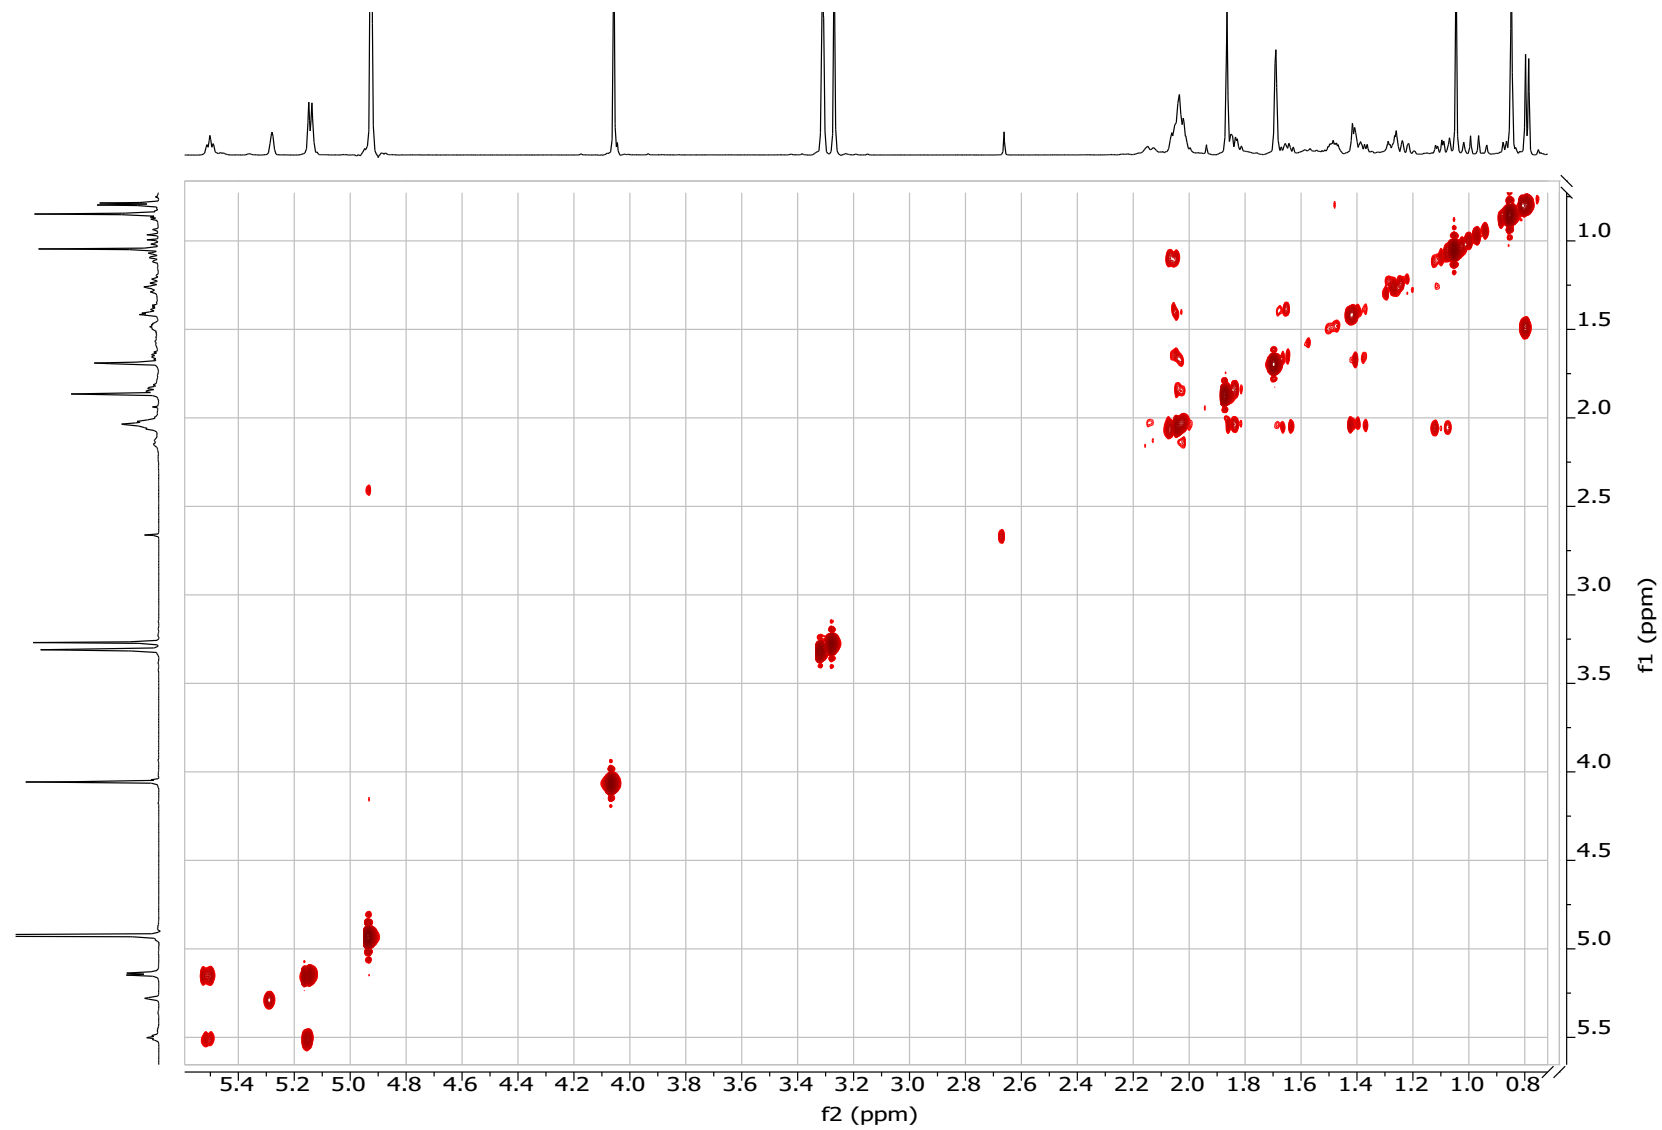

**Figure S22.** COSY spectrum of Agelasine Y (3) in CD<sub>3</sub>OD.

1/9B034\_4/.10.ser

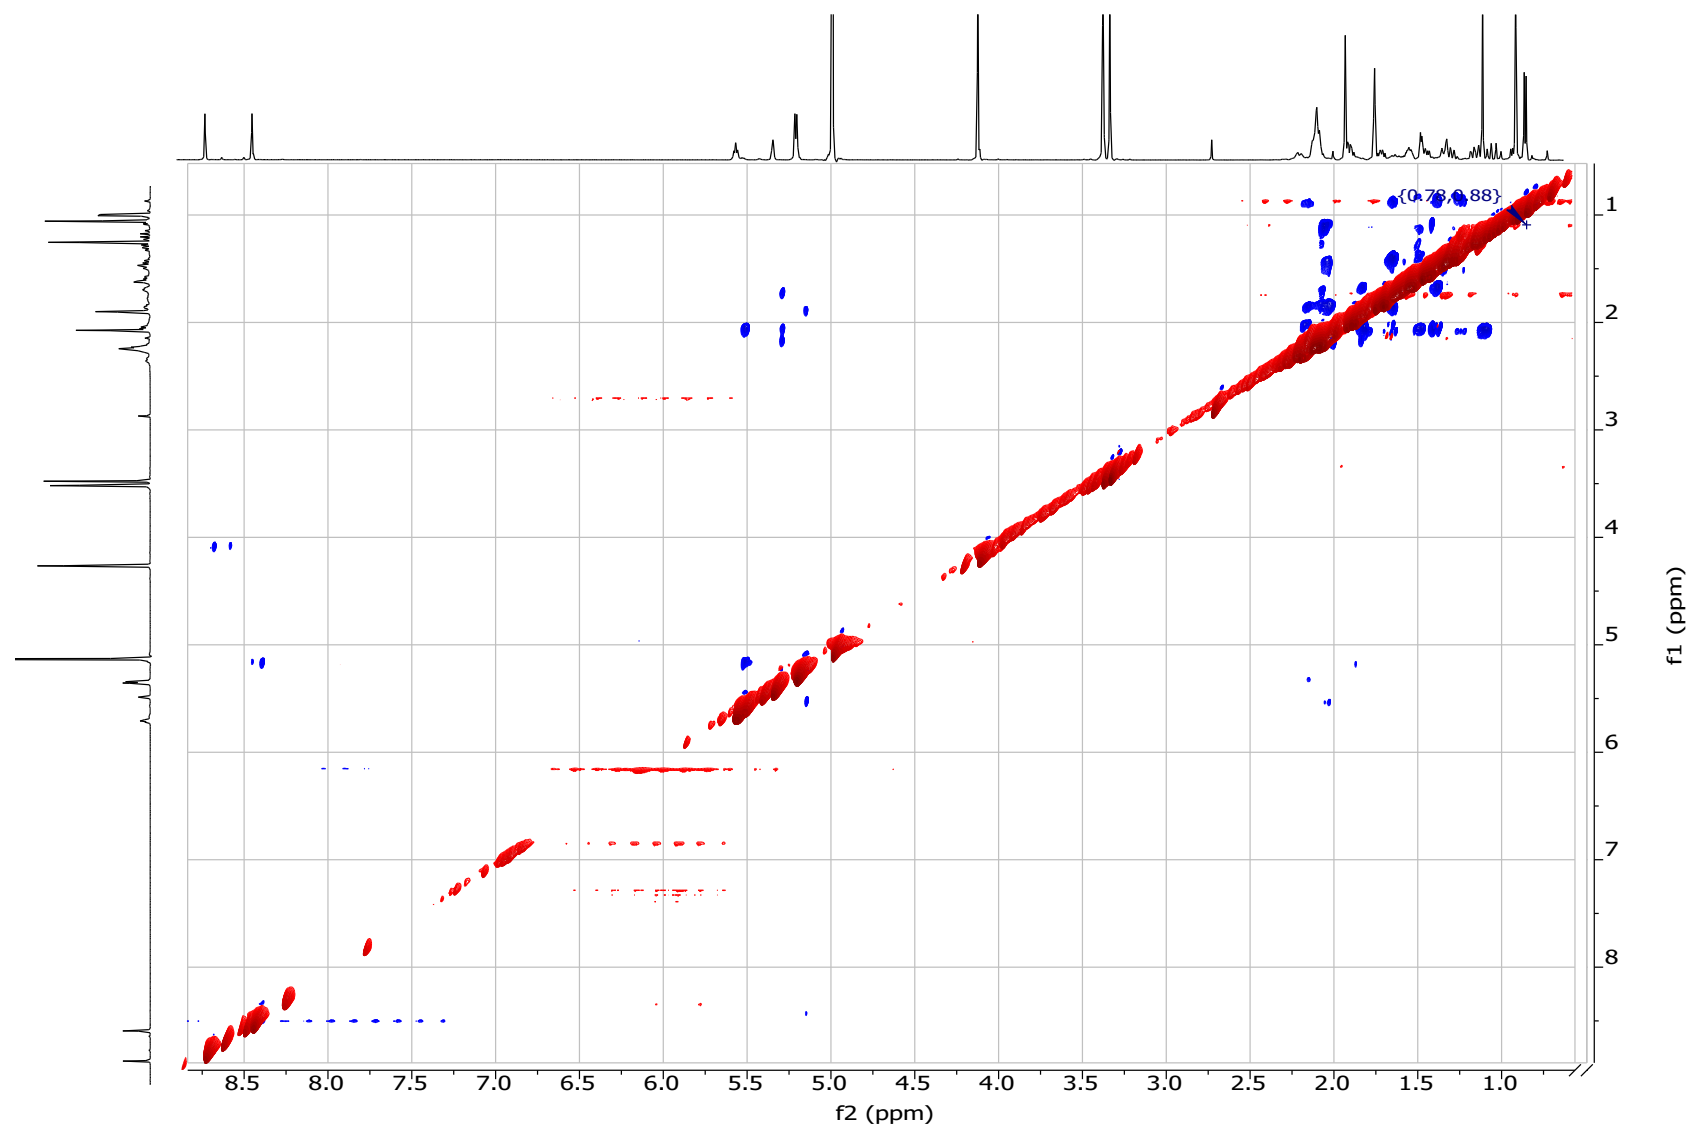

**Figure S23.** NOESY spectrum of Agelasine Y (**3**) in CD<sub>3</sub>OD.

# Analysis Report

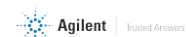

## Sample Information

|                |              |                    |                                                                                     |
|----------------|--------------|--------------------|-------------------------------------------------------------------------------------|
| Name           | 1798034-47   | Data File Path     | C:\Users\jokeschh\Desktop\QTOF-DATA\ANALYSIS-ADMIN by HEIDIB\Wel102919\1798034-47.d |
| Sample ID      |              | Acq. Time (Local)  | 10/29/2019 8:53:13 AM (UTC-05:00)                                                   |
| Instrument     | Instrument 1 | Method Path (Acq)  | D:\MassHunter\Methods\FIA_SM_LowFlow.m                                              |
| MS Type        | QTOF         | Version (Acq SW)   | 6200 series TOF/6500 series Q-TOF B.09.00 (B9044.1 SP1)                             |
| Inj. Vol. (ul) | 1            | IRM Status         | Some ions missed                                                                    |
| Position       | Vial 17      | Method Path (DA)   |                                                                                     |
| Plate Pos.     |              | Target Source Path |                                                                                     |
| Operator       |              | Result Summary     |                                                                                     |

## Sample Chromatograms

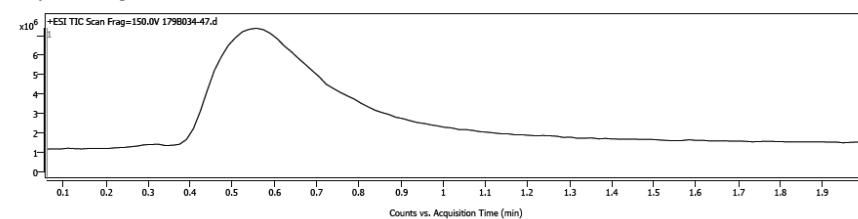

## Sample Spectra

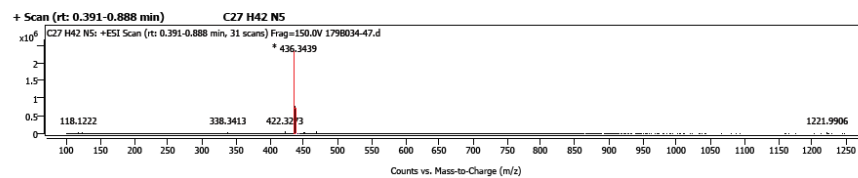

## Spectrum Identification Table

| Best ID Source | Name | Formula    | Species | m/z      | Diff (ppm) | CAS | Score | Score (Lib) | Score (DB) | Score (MFG) | Lib/DB |
|----------------|------|------------|---------|----------|------------|-----|-------|-------------|------------|-------------|--------|
| Yes_MFG        |      | C27 H42 N5 | M+      | 436.3439 | 0.51       |     | 97.80 |             |            | 97.80       |        |

MassHunter Qual 10.0  
(End of Report)

**Figure S24.** HRESIMS spectrum of Agelasine Y (3).

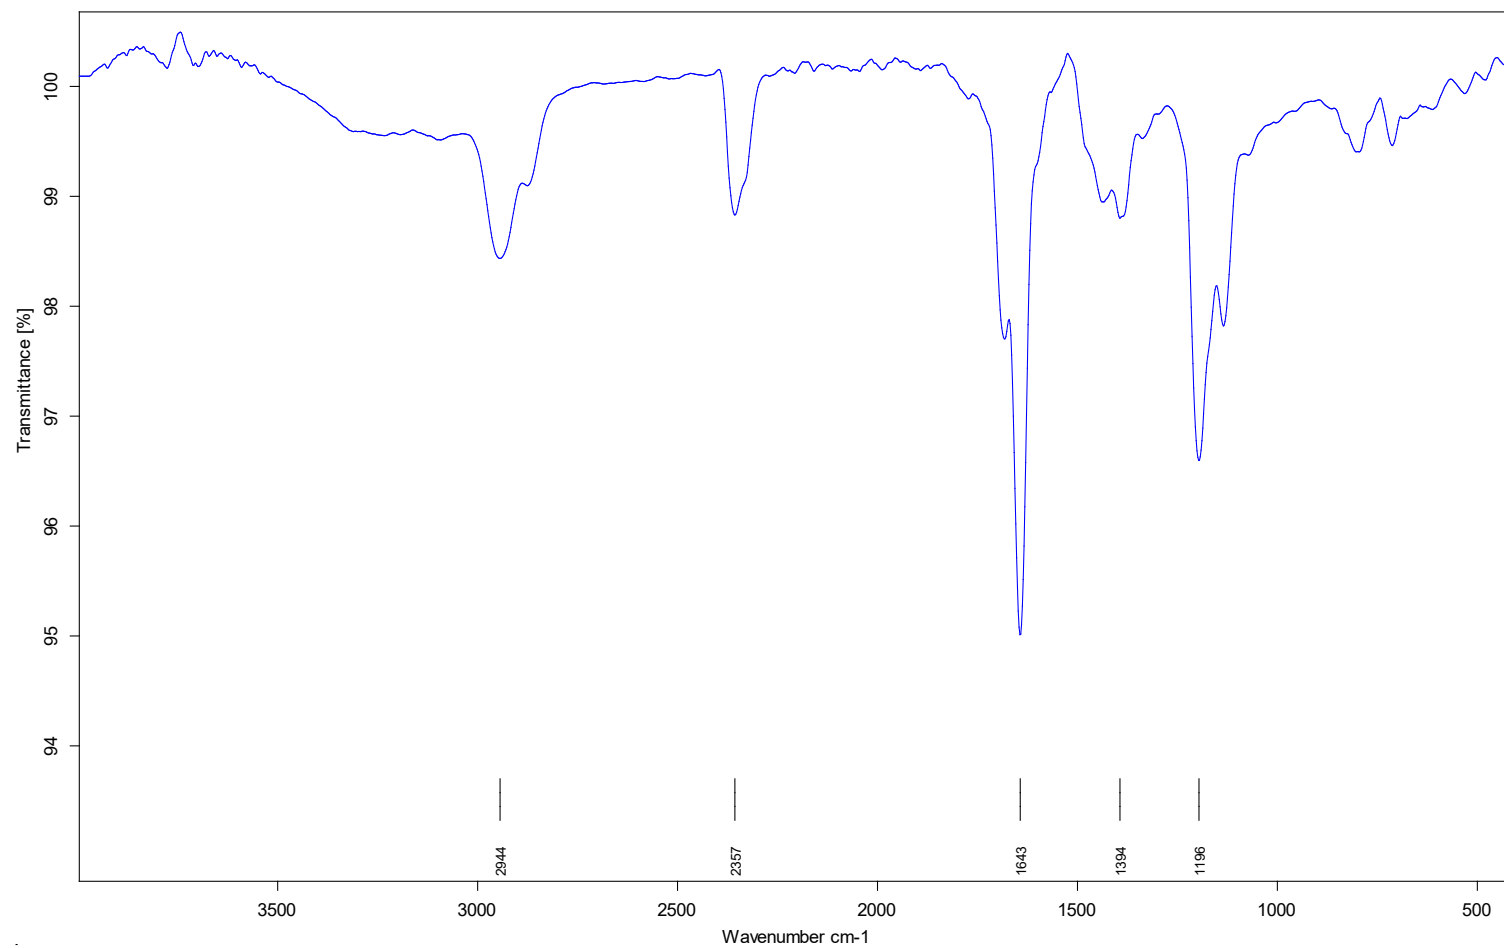

**Figure S25.** IR spectrum (neat) of Agelasine Y (**3**).



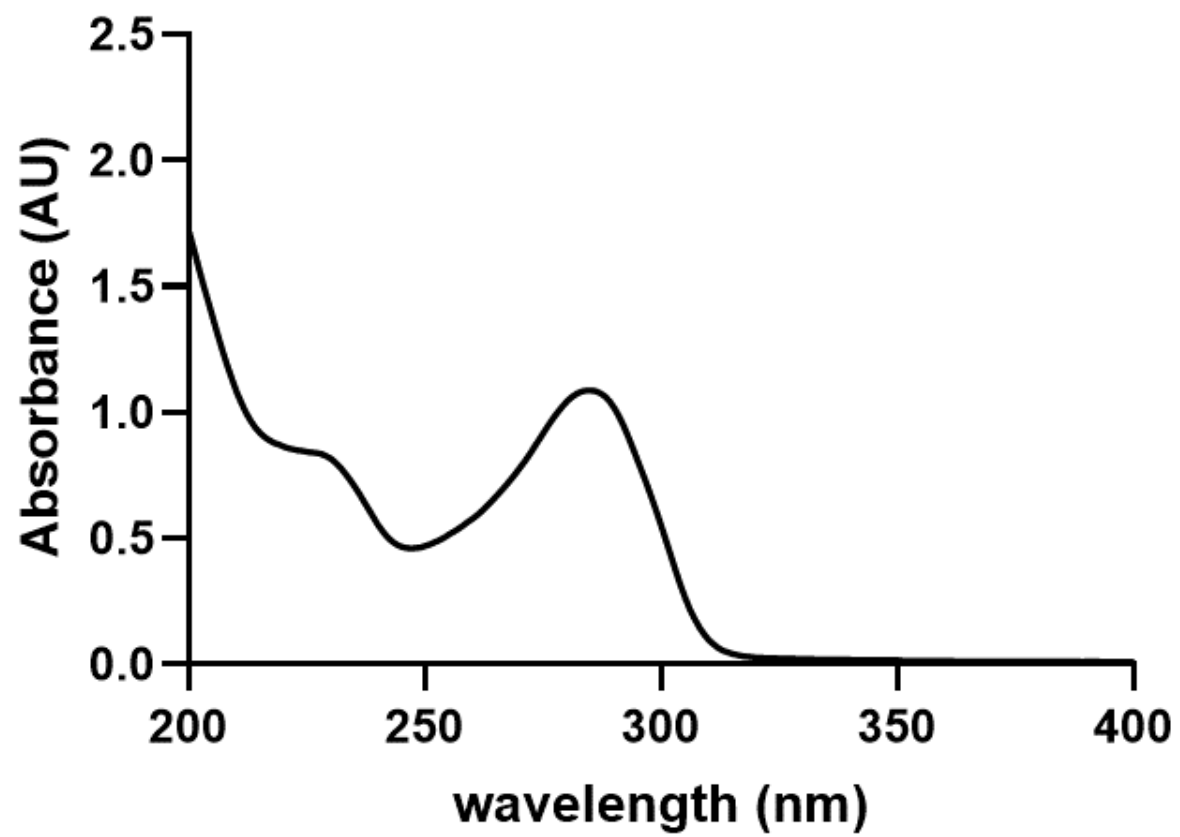

**Figure S26.** UV spectrum of Agelasine Y (3).

**Figure S27.**  $^1\text{H}$  NMR spectrum (600 MHz) of *N*(1)-methylisoageliferin (**4**) in  $\text{CD}_3\text{OD}$ .

179B053\_31.5.fid

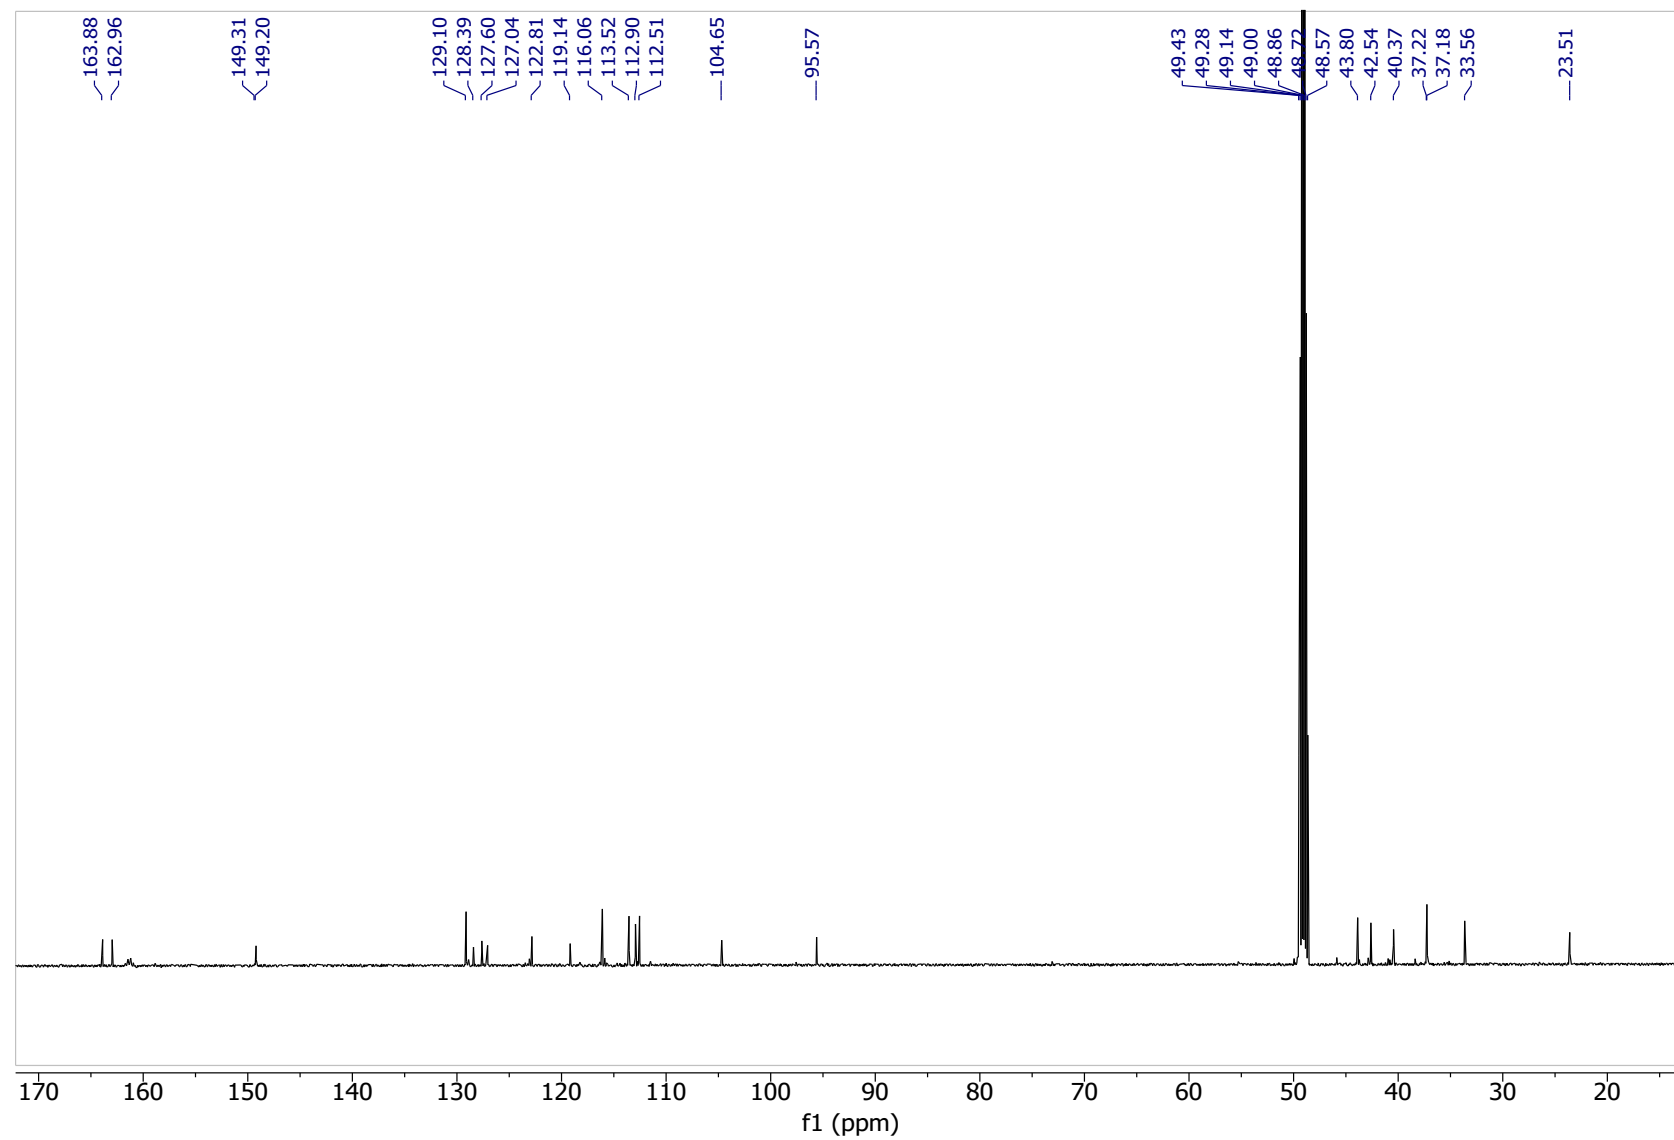

**Figure S28.**  $^{13}\text{C}$  NMR spectrum (150 MHz) of *N*(1)-methylisoageliferin (**4**) in  $\text{CD}_3\text{OD}$ .

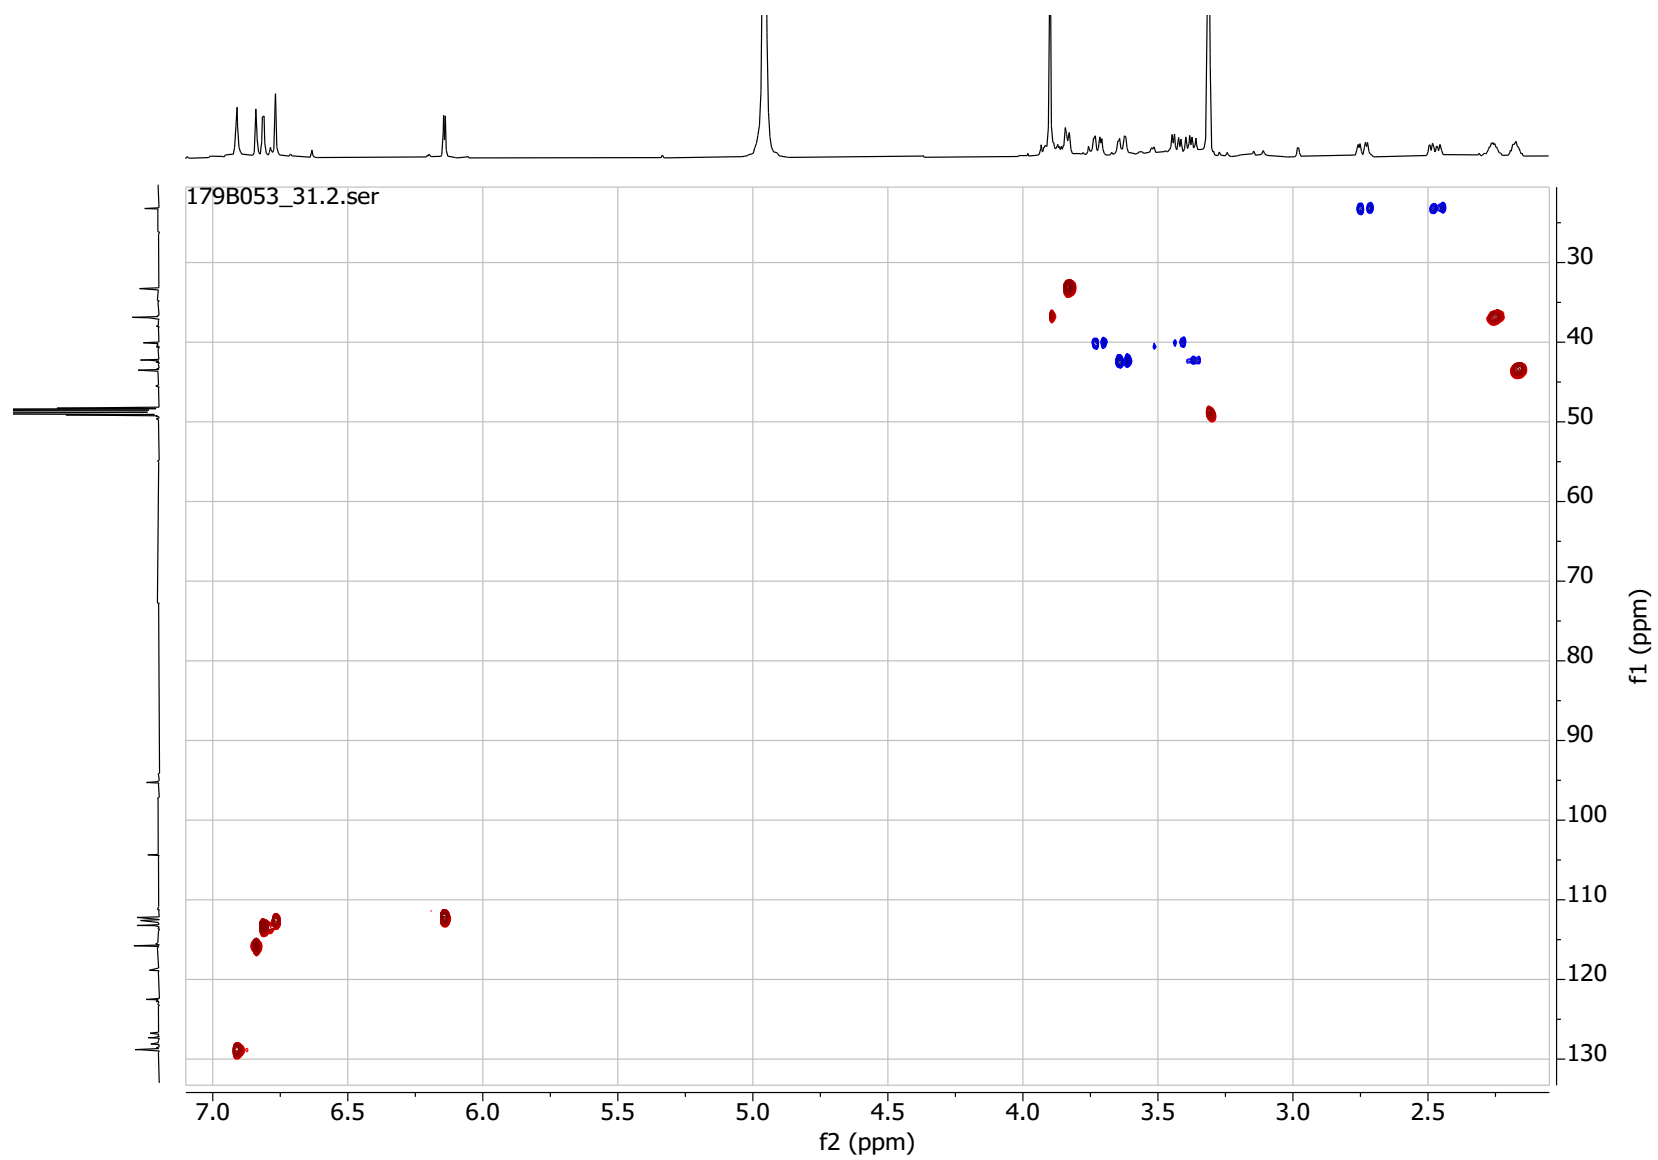

**Figure S29.** HSQC spectrum of *N*(1)-methylisoageliferin (**4**) in  $\text{CD}_3\text{OD}$ .

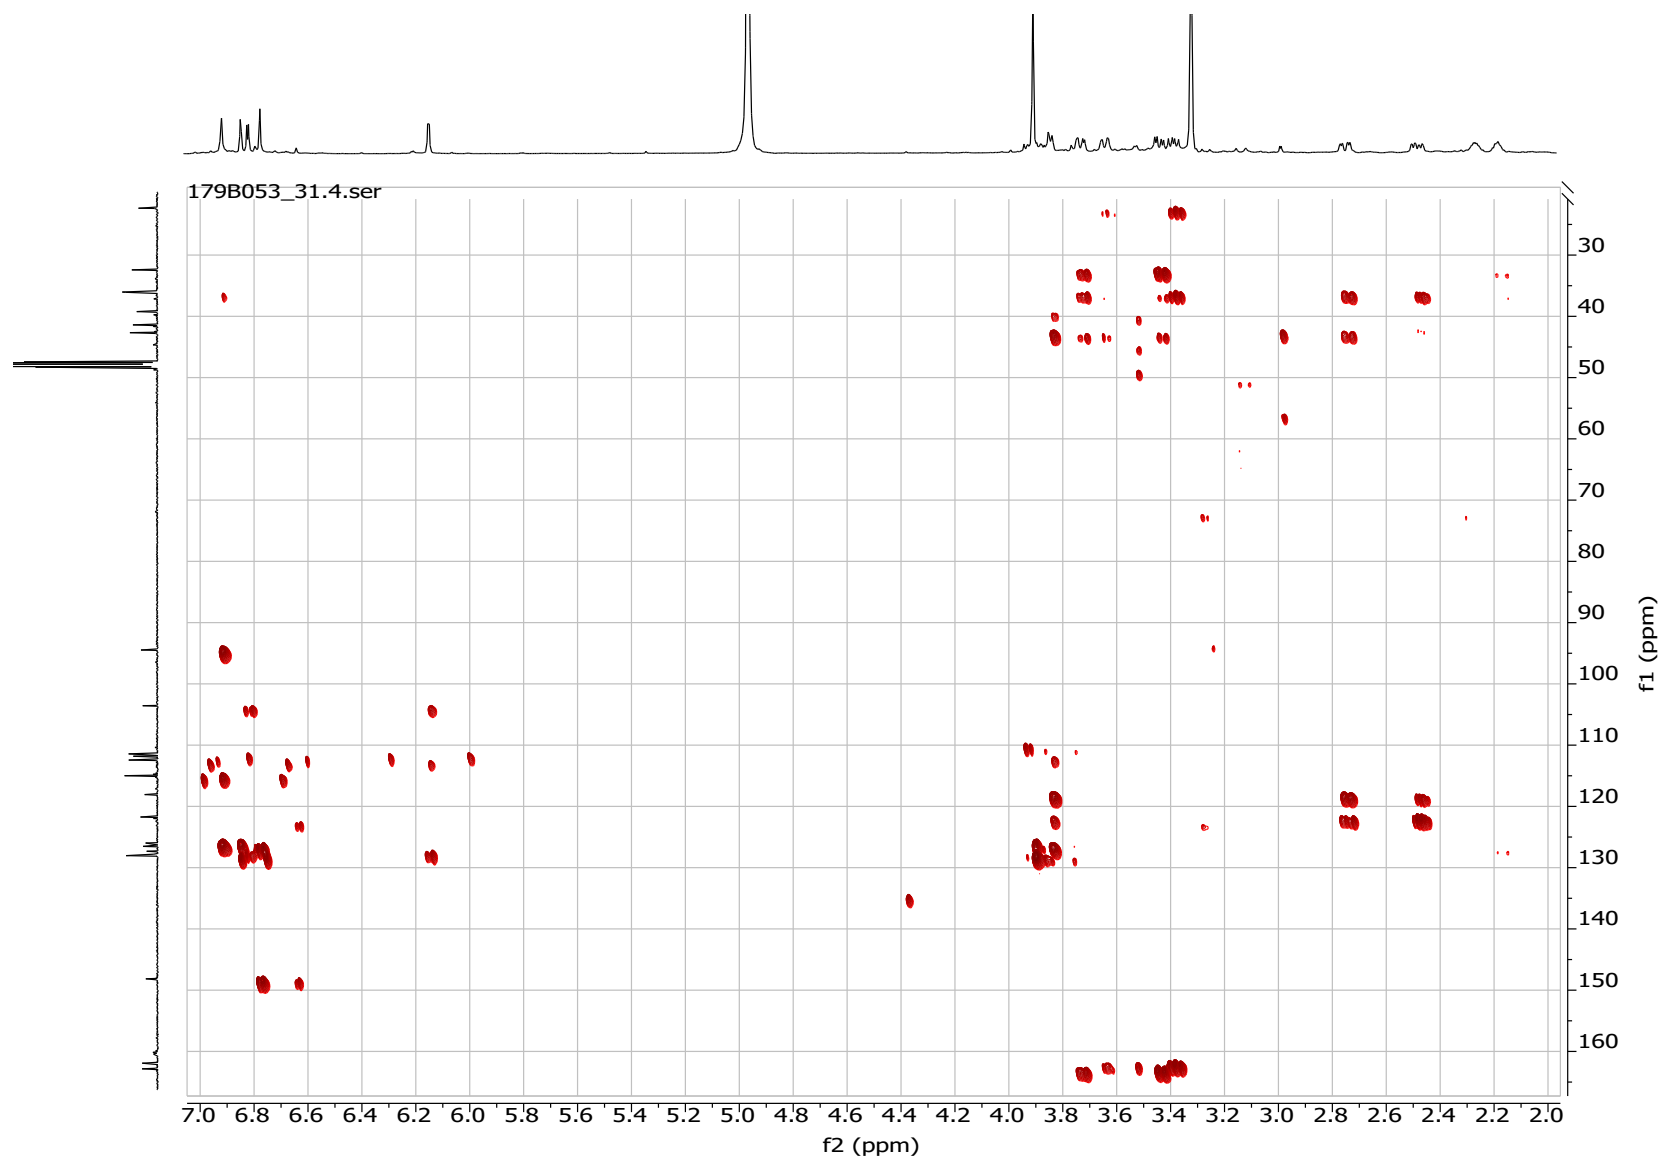

**Figure S30.** HMBC spectrum of *N*(1)-methyloageliferin (**4**) in  $\text{CD}_3\text{OD}$ .

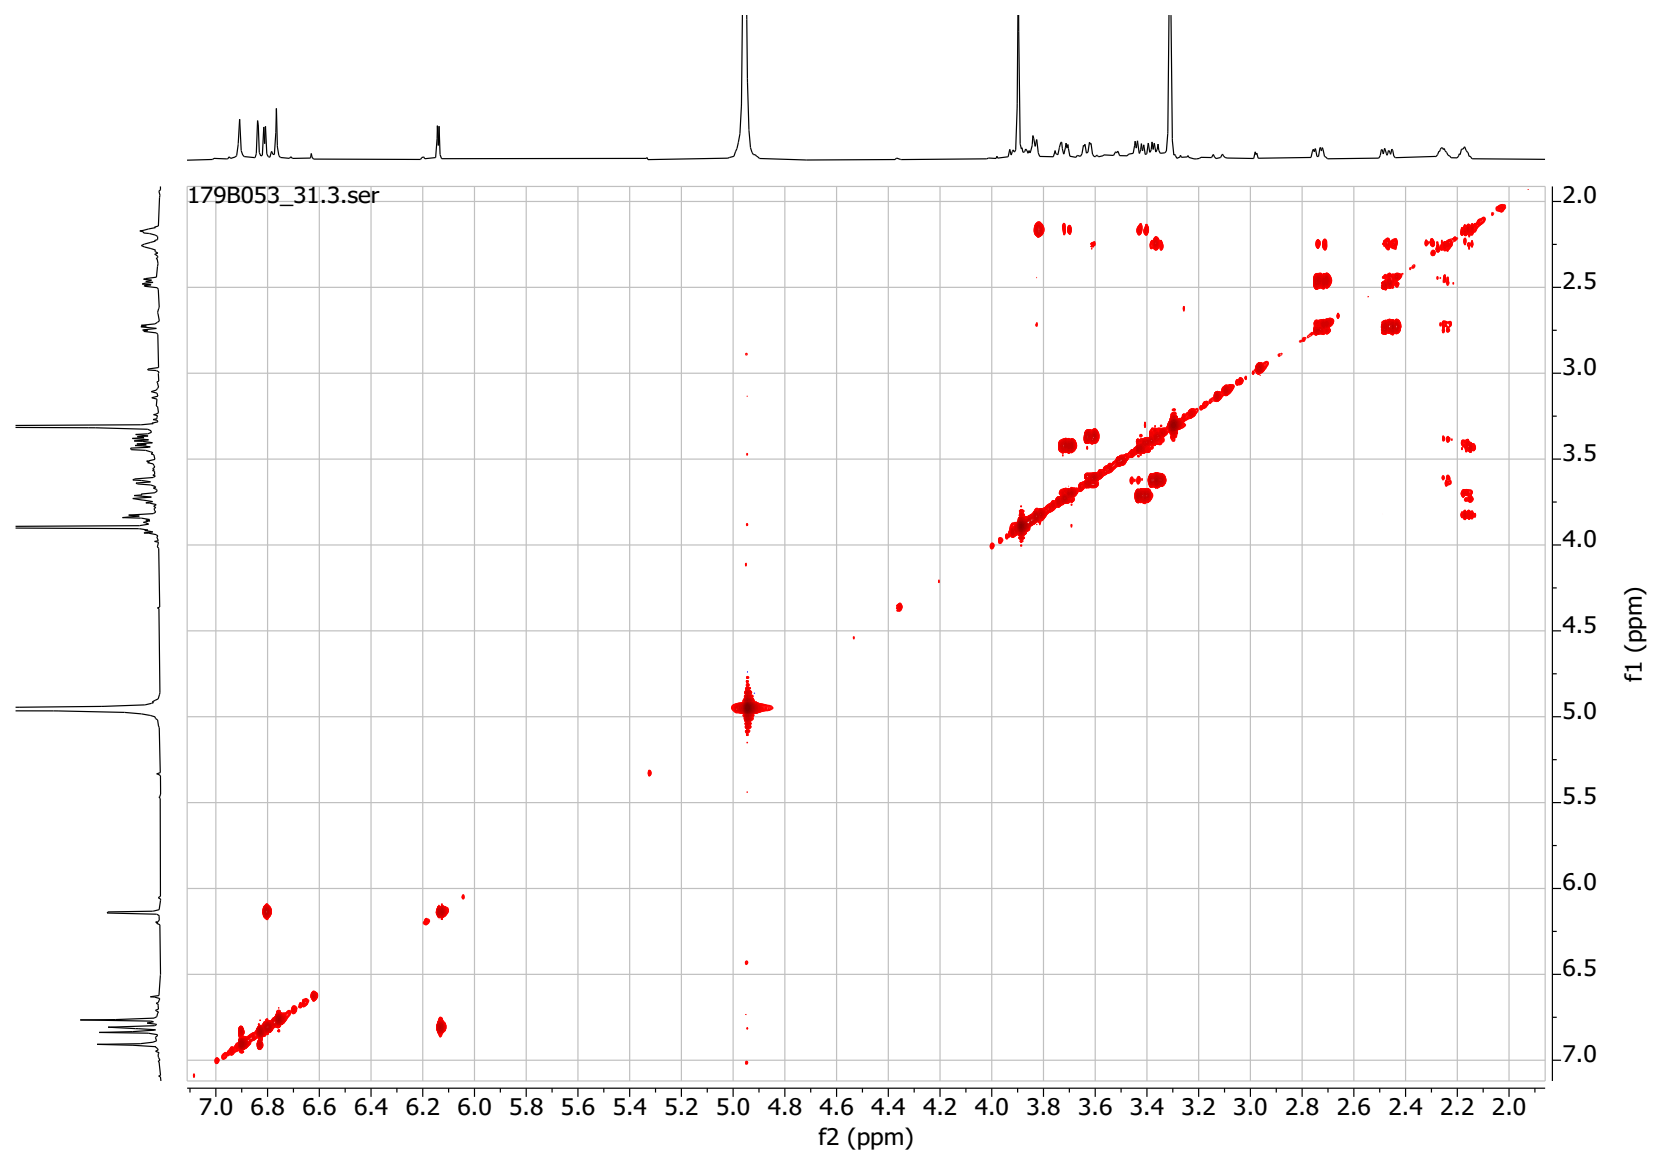

**Figure S31.** COSY spectrum of *N*(1)-methylisoageliferin (**4**) in CD<sub>3</sub>OD.

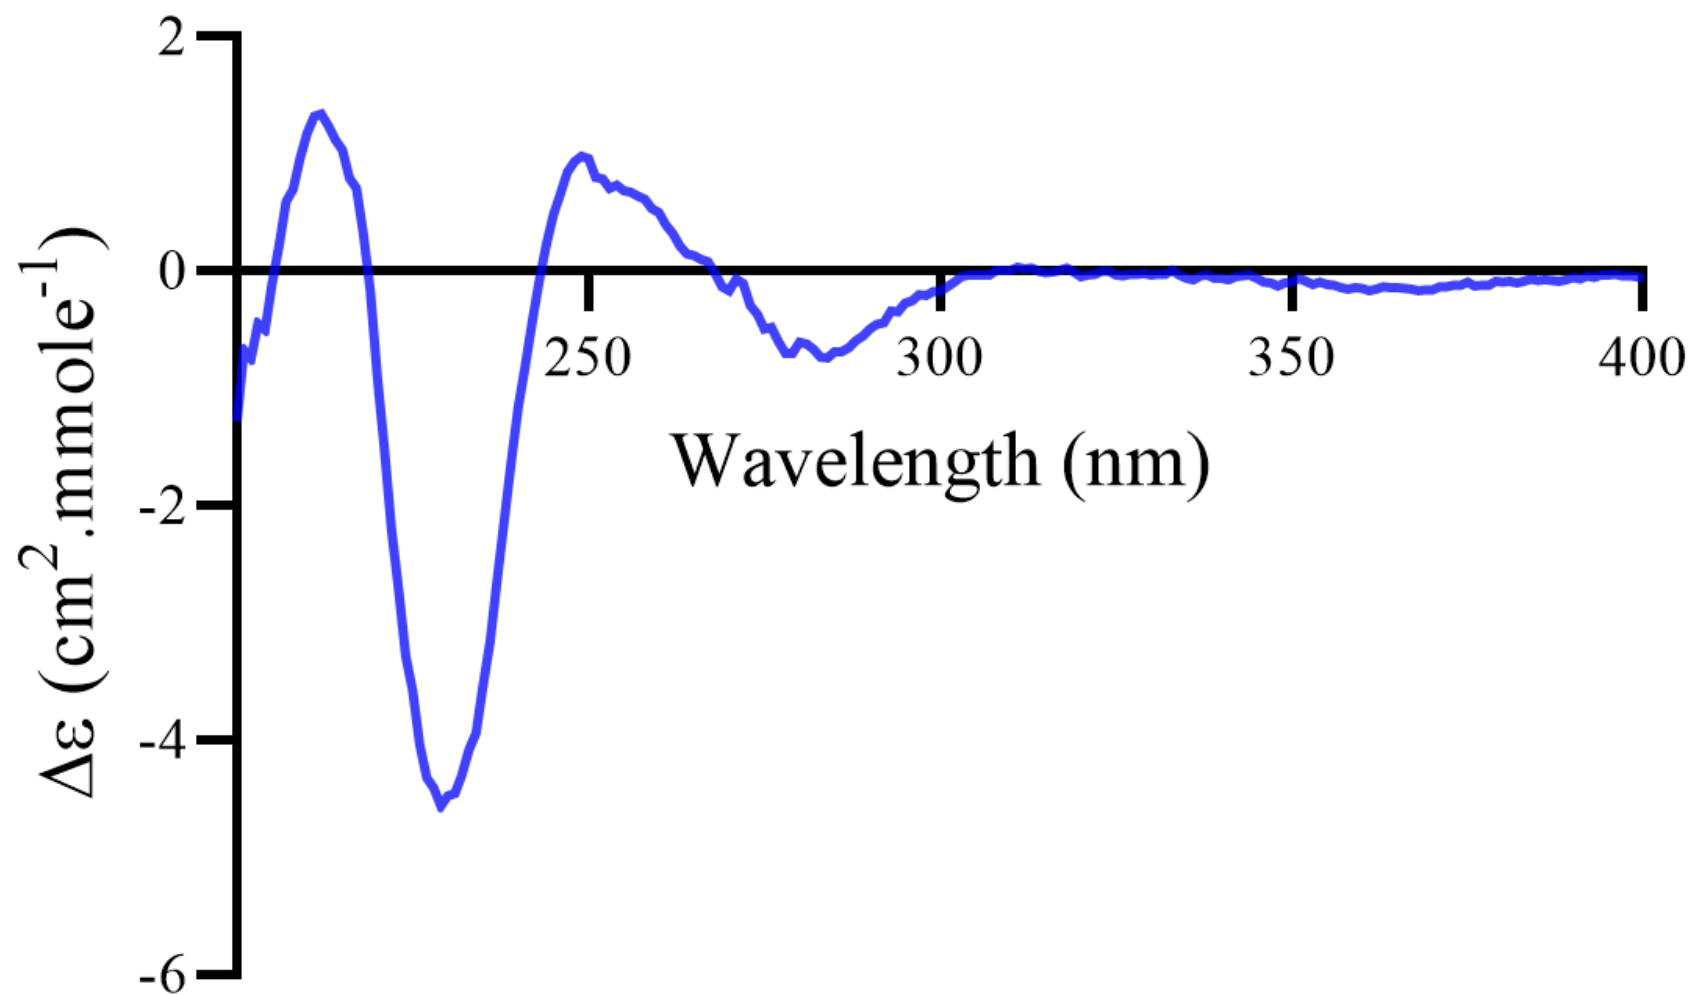

**Figure S32.** ECD spectrum of *N*(1)-methylisoageliferin (**4**).

## Analysis Report

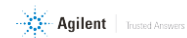

### Sample Information

|                |              |                    |                                                                                     |
|----------------|--------------|--------------------|-------------------------------------------------------------------------------------|
| Name           | 1798053-31   | Data File Path     | C:\Users\Public\Desktop\QTOF\data\Data\1798053-31.d                                 |
| Sample ID      |              | Acq. Time (Local)  | 2/6/2020 10:09:41 AM (UTC-05:00)                                                    |
| Instrument     | Instrument 1 | Method Path (Acq)  | C:\Users\admin\Desktop\methods\FIA_SM_LowFlow.m                                     |
| MS Type        | QTOF         | Version (Acq SW)   | 6200 series TOF/6500 series Q-TOF B.09.00 (B9044.1 SP1)                             |
| Inj. Vol. (ul) | 1            | IRM Status         | Success                                                                             |
| Position       | Vial 1       | Method Path (DA)   | C:\Users\Public\Desktop\QTOF\data\Data\1798053-31.d\Results\Qual\Version4\Default.m |
| Plate Pos.     |              | Target Source Path |                                                                                     |
| Operator       |              | Result Summary     |                                                                                     |

### Sample Chromatograms

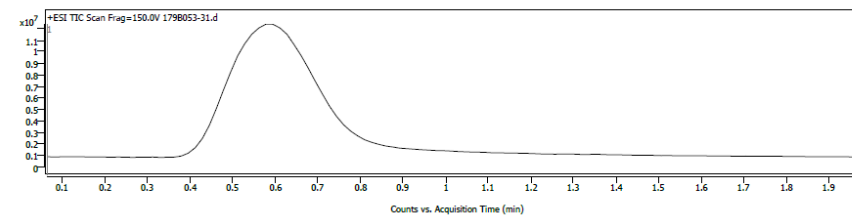

### Sample Spectra

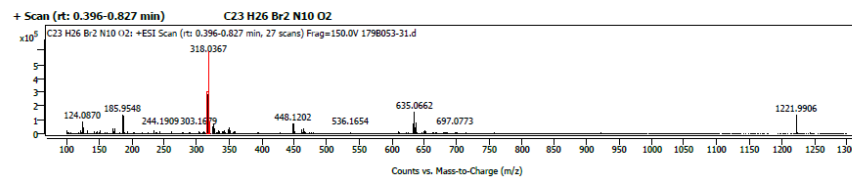

### Spectrum Identification Table

| Best ID Source | Name | Formula            | Species  | m/z      | Diff (ppm) | CAS | Score | Score (Lib) | Score (DB) | Score (MFG) | Lib/DB |
|----------------|------|--------------------|----------|----------|------------|-----|-------|-------------|------------|-------------|--------|
| Yes_MFG        |      | C23 H26 Br2 N10 O2 | (M+2H)+2 | 317.0374 | -0.52      |     | 99.63 |             |            | 99.63       |        |

MassHunter Qual 10.0  
(End of Report)

**Figure S33.** HRESIMS spectrum of *N*(1)-methylisoageliferin (**4**).



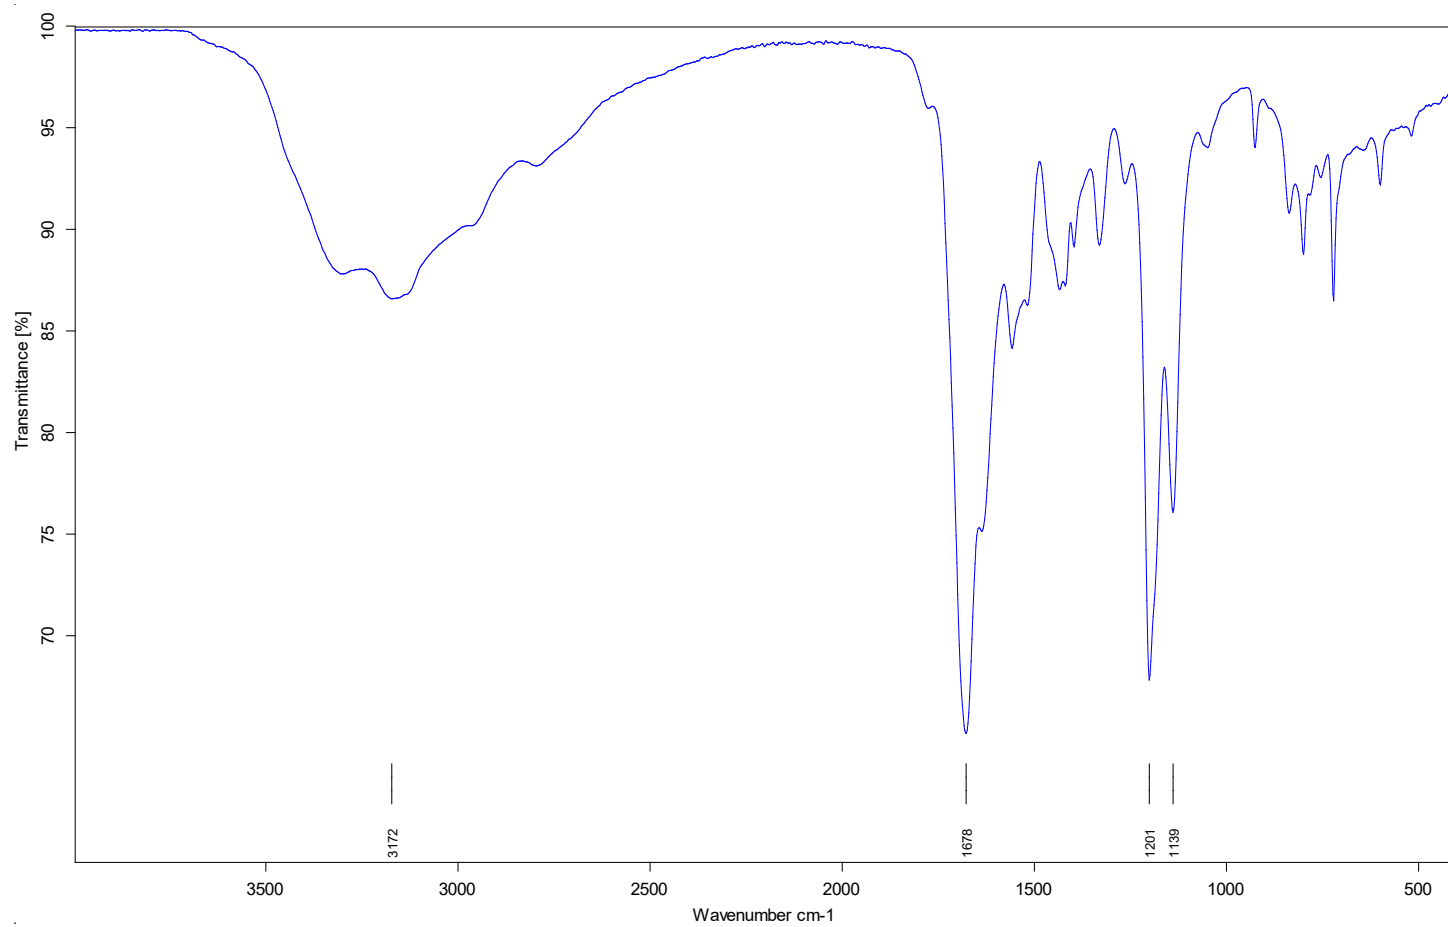

**Figure S34.** IR spectrum (neat) of *N*(1)-methyloageliferin (**4**).

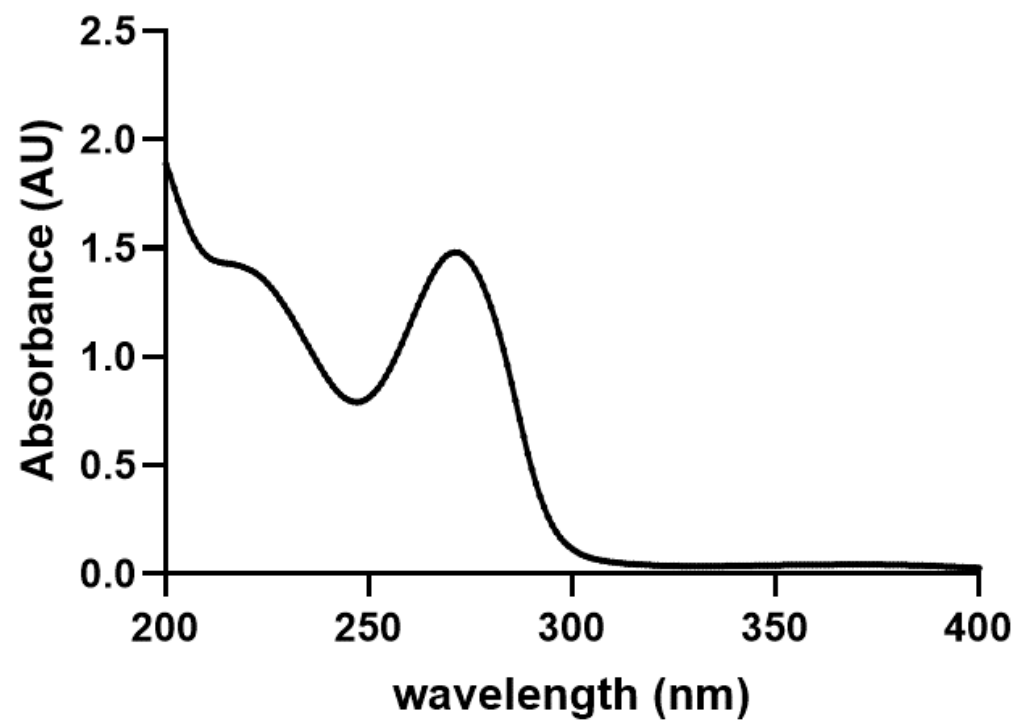

**Figure S35.** UV spectrum of *N*(1)-methylisoageliferin (**4**).

**Table 1** <sup>1</sup>H NMR (600 MHz) data for compounds **5-10** in CD<sub>3</sub>OD (*J* in Hz).

| position | 5                          | 6                          | 7                          | 8                          | 9                          | 10                         |
|----------|----------------------------|----------------------------|----------------------------|----------------------------|----------------------------|----------------------------|
| 2        | 6.97, d (1.5)              | 6.95, d (1.5)              | 6.93, d (1.5)              | 6.92, d (1.5)              |                            | 6.97, d (1.5)              |
| 2'       |                            |                            |                            | 6.92, d (1.5)              | 6.91, d (1.5)              |                            |
| 3'       | 6.22, d (4.0)              | 6.93, d (1.5)              | 6.21, d (4.0)              |                            |                            |                            |
| 4        | 7.25, d (1.5)              | 7.26, d (1.5)              | 7.15, d (1.5)              | 7.12, d (1.5)              | 7.30, s                    | 7.22, d (1.5)              |
| 4'       | 6.85, d (4.0)              | 6.81, d (1.5)              | 6.86, d (4.0)              | 6.87, d (1.5)              | 6.81, d (1.5)              | 6.94, s                    |
| 8a       | 3.94, dd (14.8, 3.2)       | 3.95, dd (14.8, 3.2)       | 3.93, dd (14.8, 3.2)       | 3.97, dd (14.8, 3.2)       | 3.96, dd (14.8, 3.2)       | 3.95, dd (14.8, 3.2)       |
| 8b       | 3.47, dd (14.8, 4.3)       | 3.47, dd (14.8, 4.3)       | 3.43, dd (14.8, 4.3)       | 3.39, dd (14.8, 4.3)       | 3.47, dd (14.8, 4.3)       | 3.48, dd (14.8, 4.3)       |
| 8'a      | 3.87, dd (14.0, 2.7)       | 3.86, dd (14.0, 2.7)       | 3.86, dd (14.0, 2.7)       | 3.89, dd (14.0, 2.7)       | 3.87, dd (14.0, 2.7)       | 3.86, dd (14.0, 2.7)       |
| 8'b      | 3.07, dd (14.0, 9.6)       | 3.02, dd (14.0, 9.6)       | 3.06, dd (14.0, 9.6)       | 3.07, dd (14.0, 9.6)       | 3.02, dd (14.0, 9.6)       | 3.07, dd (14.0, 9.6)       |
| 9        | 2.03, m                    | 1.99, m                    | 2.04, m                    | 2.03, m                    | 2.00, m                    | 2.02, m                    |
| 9'       | 2.19, m                    | 2.18, m                    | 2.19, m                    | 2.17, m                    | 2.18, m                    | 2.20, m                    |
| 10       | 3.76, br d (8.5)           | 3.73, br d (8.5)           | 3.76, br d (8.5)           | 3.77, br d (8.5)           | 3.74, br d (8.5)           | 3.76, br d (8.5)           |
| 10'a     | 2.85, dd (16.3, 5.3)       | 2.84, dd (16.3, 5.3)       | 2.83, dd (16.3, 5.3)       | 2.82, dd (16.3, 5.3)       | 2.85, dd (16.3, 5.3)       | 2.85, dd (16.3, 5.3)       |
| 10'b     | 2.45, ddd (16.3, 9.0, 2.9) | 2.42, ddd (16.3, 9.0, 2.9) | 2.44, ddd (16.3, 9.0, 2.9) | 2.44, ddd (16.3, 9.0, 2.9) | 2.43, ddd (16.3, 9.0, 2.9) | 2.43, ddd (16.3, 9.0, 2.9) |
| 15       | 6.85, br s                 | 6.85, br s                 | 6.84, br s                 | 6.85, br s                 | 6.87, br s                 | 6.85, br s                 |
| NMe      |                            |                            | 3.91, s                    | 3.93, s                    |                            |                            |
| N'Me     | 3.99, s                    | 3.97, s                    | 3.96, s                    | 3.95, s                    | 3.98, s                    | 4.03, s                    |

**Table S2.**  $^{13}\text{C}$  NMR (150 MHz) data for compounds **5-10** in  $\text{CD}_3\text{OD}$ .

| position | 5                   | 6                   | 7                   | 8                   | 9                   | 10                  |
|----------|---------------------|---------------------|---------------------|---------------------|---------------------|---------------------|
| 2        | 123.2, CH           | 123.2, CH           | 129.1, CH           | 129.0, CH           | 106.4, C            | 123.2, CH           |
| 2'       | 111.2, C            | 129.0, CH           | 111.2, C            | 129.0, CH           | 129.1, CH           | 112.9, C            |
| 3        | 97.6, C             | 97.6, C             | 95.5, C             | 95.4, C             | 100.0, C            | 97.6, C             |
| 3'       | 111.6, CH           | 95.5, C             | 111.5, CH           | 95.4, C             | 95.5, C             | 99.1, C             |
| 4        | 114.3, CH           | 114.3, CH           | 116.4, CH           | 116.3, CH           | 115.2, CH           | 114.2, CH           |
| 4'       | 114.7, CH           | 115.8, CH           | 114.6, CH           | 115.8, CH           | 115.8, CH           | 116.0, CH           |
| 5        | 127.1, C            | 127.2, C            | 127.0, C            | 127.0, C            | 128.4, C            | 127.3, C            |
| 5'       | 127.9, C            | 127.2, C            | 127.9, C            | 127.0, C            | 127.0, C            | 128.5, C            |
| 6        | 163.3, C            | 163.3, C            | 163.9, C            | 163.5, C            | 162.5, C            | 163.3, C            |
| 6'       | 164.0, C            | 163.6, C            | 163.9, C            | 163.8, C            | 163.6, C            | 163.0, C            |
| 8        | 38.9, $\text{CH}_2$ | 38.8, $\text{CH}_2$ | 38.9, $\text{CH}_2$ | 39.1, $\text{CH}_2$ | 38.8, $\text{CH}_2$ | 39.0, $\text{CH}_2$ |
| 8'       | 43.0, $\text{CH}_2$ | 43.0, $\text{CH}_2$ | 42.9, $\text{CH}_2$ | 42.8, $\text{CH}_2$ | 43.0, $\text{CH}_2$ | 43.0, $\text{CH}_2$ |
| 9        | 44.2, CH            | 44.3, CH            | 44.2, CH            | 43.9, CH            | 44.2, CH            | 44.2, CH            |
| 9'       | 37.5, CH            | 37.5, CH            | 37.5, CH            | 37.6, CH            | 37.5, CH            | 37.4, CH            |
| 10       | 33.4, CH            | 33.3, CH            | 33.5, CH            | 33.7, CH            | 33.4, CH            | 33.3, CH            |
| 10'      | 24.9, $\text{CH}_2$ | 24.9, $\text{CH}_2$ | 24.9, $\text{CH}_2$ | 25.0, $\text{CH}_2$ | 25.0, $\text{CH}_2$ | 24.8, $\text{CH}_2$ |
| 11       | 127.2, C            | 127.0, C            | 127.3, C            | 127.0, C            | 127.1, C            | 127.1, C            |
| 11'      | 123.0, C            | 123.0, C            | 123.0, C            | 122.9, C            | 123.0, C            | 123.0, C            |
| 13       | 149.2, C            | 149.2, C            | 149.2, C            | 149.3, C            | 149.2, C            | 149.2, C            |
| 13'      | 149.1, C            |

|      |                       |                       |                       |                       |                       |                       |
|------|-----------------------|-----------------------|-----------------------|-----------------------|-----------------------|-----------------------|
| 15   | 113.3, CH             | 113.4, CH             | 113.3, CH             | 113.3, CH             | 113.5, CH             | 113.3, CH             |
| 15'  | 119.4, C              | 119.5, C              | 119.5, C              | 119.6, C              | 119.5, C              | 119.4, C              |
| NMe  |                       |                       | 37.2, CH <sub>3</sub> | 37.4, CH <sub>3</sub> |                       |                       |
| N'Me | 35.3, CH <sub>3</sub> | 37.7, CH <sub>3</sub> | 35.4, CH <sub>3</sub> | 37.7, CH <sub>3</sub> | 37.7, CH <sub>3</sub> | 36.7, CH <sub>3</sub> |

**Table S3.** <sup>13</sup>C NMR (150 MHz) data for compounds **3** and closely related clerodane diastereomers<sup>1</sup> in CDCl<sub>3</sub>. <sup>a</sup>

| position | <b>3</b> | <i>neo-cis-cis-</i><br>kolavenol | <i>ent-neo-cis-trans-</i><br>kolavenol | <i>neo-trans-trans-</i><br>kolavenol | <i>neo-trans-cis-</i><br>kolavenol |
|----------|----------|----------------------------------|----------------------------------------|--------------------------------------|------------------------------------|
| 1        | 17.62    | 17.74                            | 20.01                                  | 17.86                                | 18.25                              |
| 2        | 23.92    | 24.06                            | 25.87                                  | 26.89                                | 26.89                              |
| 3        | 123.05   | 123.13                           | 122.41                                 | 120.25                               | 120.43                             |
| 4        | 139.72   | 139.89                           | 142.16                                 | 144.62                               | 144.55                             |
| 5        | 36.78    | 36.90                            | 38.77                                  | 38.34                                | 38.17                              |
| 6        | 37.66    | 37.78                            | 32.32                                  | 30.22                                | 36.82                              |
| 7        | 28.63    | 28.80                            | 27.25                                  | 25.61                                | 27.49                              |
| 8        | 37.27    | 37.39                            | 37.50                                  | 35.15                                | 36.24                              |
| 9        | 40.07    | 40.10                            | 38.59                                  | 37.47                                | 38.58                              |
| 10       | 44.49    | 44.66                            | 44.63                                  | 45.19                                | 46.40                              |
| 11       | 36.28    | 36.50                            | 36.03                                  | 37.86                                | 36.71                              |
| 12       | 32.87    | 32.73                            | 33.42                                  | 32.75                                | 32.81                              |
| 13       | 148.55   | 141.11                           | 141.35                                 | 141.33                               | 141.02                             |
| 14       | 114.27   | 122.85                           | 122.67                                 | 122.70                               | 122.73                             |
| 15       | 46.08    | 59.51                            | 59.48                                  | 59.50                                | 59.48                              |
| 16       | 16.69    | 16.53                            | 16.60                                  | 16.59                                | 16.55                              |
| 17       | 15.83    | 15.93                            | 15.38                                  | 14.86                                | 15.99                              |
| 18       | 19.73    | 19.73                            | 19.35                                  | 18.07                                | 18.01                              |
| 19       | 33.00    | 33.08                            | 27.71                                  | 20.61                                | 19.94                              |

|         |        |       |       |       |       |
|---------|--------|-------|-------|-------|-------|
| 20      | 17.16  | 17.28 | 26.41 | 20.42 | 18.39 |
| 2'      | 146.85 |       |       |       |       |
| 3' N-Me | 36.25  |       |       |       |       |
| 4'      | 148.41 |       |       |       |       |
| 5'      | 111.97 |       |       |       |       |
| 6'      | 152.35 |       |       |       |       |
| 8'      | 144.48 |       |       |       |       |
| 10'N-Me | 29.06  |       |       |       |       |

a. Chemical shifts were calibrated against known chloroform signals ( $\delta_C$  77.0 ppm)

Reference:

(1) Pelot, K. A.; Hagelthorn, D. M.; Hong, Y. J.; Tantillo, D. J.; Zerbe, P. Diterpene synthase-catalyzed biosynthesis of distinct clerodane stereoisomers. *ChemBioChem* **2019**, 20, 111-117.
